# Supplementary material for: Design and Synthesis of C-19 Isosteviol Derivatives as Potent and Highly Selective Antiproliferative Agents
Source: Molecules. 2018 Dec 30;24(1):121. doi: 10.3390/molecules24010121 (PMC6337650; doi:10.3390/molecules24010121)
Supplement: Supplementary file 1 [file molecules-24-00121-s001.pdf]

## Supplementary File

### Design and Synthesis of C-19 Isosteviol Derivatives as Potent and Highly Selective Antiproliferative Agents

Tian Luan<sup>a#</sup>, Li-Hua Cao<sup>b#</sup>, Hao Deng<sup>a</sup>, Qing-Kun Shen<sup>a</sup>, Yu-Shun Tian<sup>a\*</sup> & Zhe-Shan Quan<sup>a\*</sup>

<sup>a</sup>Key Laboratory of Natural Resources and Functional Molecules of the Changbai Mountain, Affiliated Ministry of Education, College of Pharmacy, Yanbian University, Yanji, Jilin, 133002, China

<sup>b</sup>Department of Pharmacology, College of Medicine, Yanbian University, Yanji, Jilin, 133002, China

**\*Corresponding author: Tel: + 86 433 243-6020; Fax: + 86 433 243-6020.**

**E-mail: zsquan@ybu.edu.cn (Z. S. Quan).**

**\*Corresponding author: E-mail: ystian@ybu.edu.cn (Y. S. Tian).**

<sup>#</sup>These authors contributed equally to this work.

#### Table of contents:

|                                                                          |         |
|--------------------------------------------------------------------------|---------|
| <sup>1</sup> H NMR and <sup>13</sup> C NMR spectra of compound <b>1a</b> | page 3  |
| <sup>1</sup> H NMR and <sup>13</sup> C NMR spectra of compound <b>1b</b> | page 4  |
| <sup>1</sup> H NMR and <sup>13</sup> C NMR spectra of compound <b>1c</b> | page 5  |
| <sup>1</sup> H NMR and <sup>13</sup> C NMR spectra of compound <b>2a</b> | page 6  |
| <sup>1</sup> H NMR and <sup>13</sup> C NMR spectra of compound <b>2b</b> | page 7  |
| <sup>1</sup> H NMR and <sup>13</sup> C NMR spectra of compound <b>2c</b> | page 8  |
| <sup>1</sup> H NMR and <sup>13</sup> C NMR spectra of compound <b>2d</b> | page 9  |
| <sup>1</sup> H NMR and <sup>13</sup> C NMR spectra of compound <b>2e</b> | page 10 |
| <sup>1</sup> H NMR and <sup>13</sup> C NMR spectra of compound <b>3a</b> | page 11 |
| <sup>1</sup> H NMR and <sup>13</sup> C NMR spectra of compound <b>3b</b> | page 12 |
| <sup>1</sup> H NMR and <sup>13</sup> C NMR spectra of compound <b>3c</b> | page 13 |
| <sup>1</sup> H NMR and <sup>13</sup> C NMR spectra of compound <b>3d</b> | page 14 |

|                                                                          |         |
|--------------------------------------------------------------------------|---------|
| <sup>1</sup> H NMR and <sup>13</sup> C NMR spectra of compound <b>4a</b> | page 15 |
| <sup>1</sup> H NMR and <sup>13</sup> C NMR spectra of compound <b>4b</b> | page 16 |
| <sup>1</sup> H NMR and <sup>13</sup> C NMR spectra of compound <b>4c</b> | page 17 |
| <sup>1</sup> H NMR and <sup>13</sup> C NMR spectra of compound <b>4d</b> | page 18 |
| <sup>1</sup> H NMR and <sup>13</sup> C NMR spectra of compound <b>4e</b> | page 19 |
| <sup>1</sup> H NMR and <sup>13</sup> C NMR spectra of compound <b>4f</b> | page 20 |
| <sup>1</sup> H NMR and <sup>13</sup> C NMR spectra of compound <b>4g</b> | page 21 |
| <sup>1</sup> H NMR and <sup>13</sup> C NMR spectra of compound <b>4h</b> | page 22 |
| <sup>1</sup> H NMR and <sup>13</sup> C NMR spectra of compound <b>4i</b> | page 23 |
| <sup>1</sup> H NMR and <sup>13</sup> C NMR spectra of compound <b>4j</b> | page 24 |
| <sup>1</sup> H NMR and <sup>13</sup> C NMR spectra of compound <b>5a</b> | page 25 |
| <sup>1</sup> H NMR and <sup>13</sup> C NMR spectra of compound <b>5b</b> | page 26 |
| <sup>1</sup> H NMR and <sup>13</sup> C NMR spectra of compound <b>5c</b> | page 27 |
| <sup>1</sup> H NMR and <sup>13</sup> C NMR spectra of compound <b>5d</b> | page 28 |
| <sup>1</sup> H NMR and <sup>13</sup> C NMR spectra of compound <b>5e</b> | page 29 |
| <sup>1</sup> H NMR and <sup>13</sup> C NMR spectra of compound <b>6a</b> | page 30 |
| <sup>1</sup> H NMR and <sup>13</sup> C NMR spectra of compound <b>6b</b> | page 31 |
| <sup>1</sup> H NMR and <sup>13</sup> C NMR spectra of compound <b>6c</b> | page 32 |
| <sup>1</sup> H NMR and <sup>13</sup> C NMR spectra of compound <b>6d</b> | page 33 |
| <sup>1</sup> H NMR and <sup>13</sup> C NMR spectra of compound <b>6e</b> | page 34 |
| HRMS spectra of compound <b>2d</b>                                       | page 35 |
| HRMS spectra of compound <b>2e</b>                                       | page 36 |
| HRMS spectra of compound <b>3b</b>                                       | page 37 |
| HRMS spectra of compound <b>5b</b>                                       | page 38 |
| HRMS spectra of compound <b>5c</b>                                       | page 39 |
| HRMS spectra of compound <b>5d</b>                                       | page 40 |
| HRMS spectra of compound <b>6c</b>                                       | page 41 |
| HRMS spectra of compound <b>6d</b>                                       | page 42 |
| <sup>1</sup> H-NMR spectra of intermediate <b>Va</b>                     | page 43 |

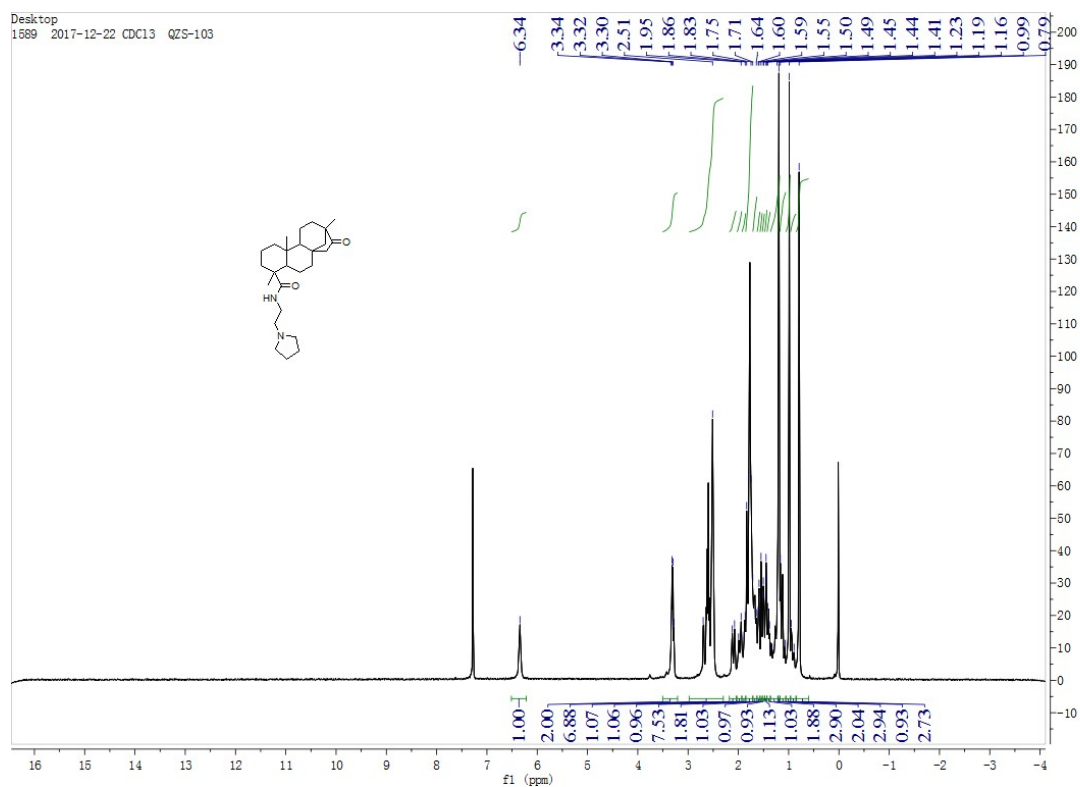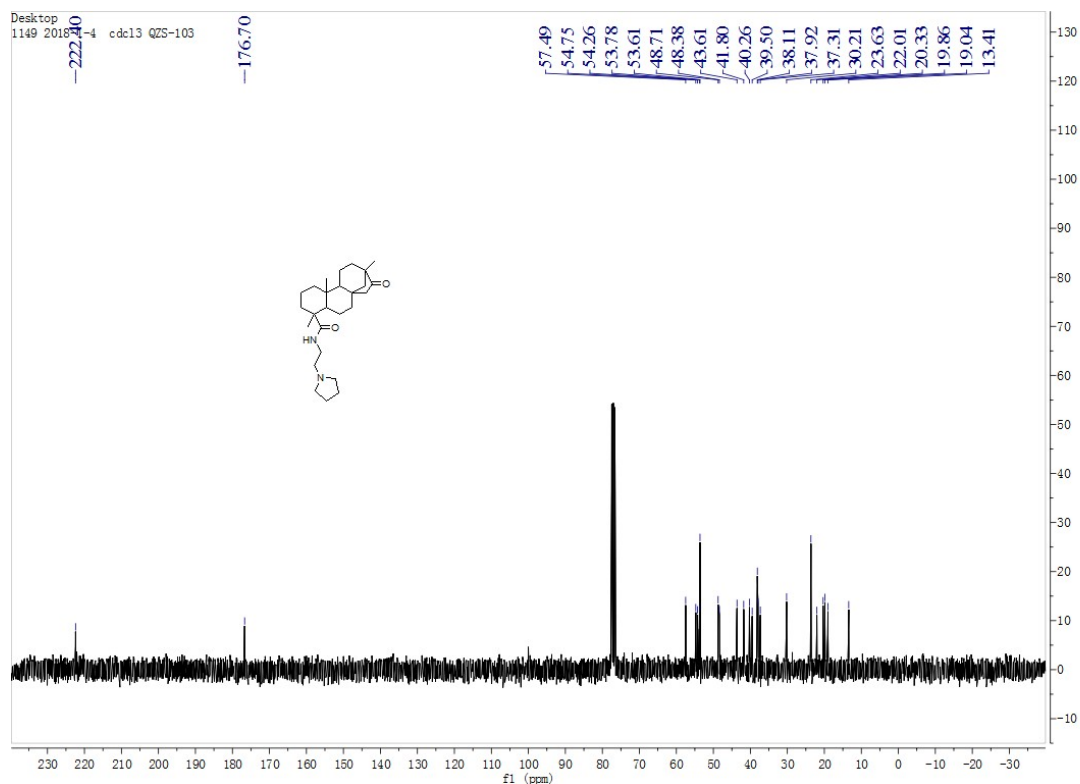

$^1\text{H}$  NMR and  $^{13}\text{C}$  NMR spectra of compound **1a**

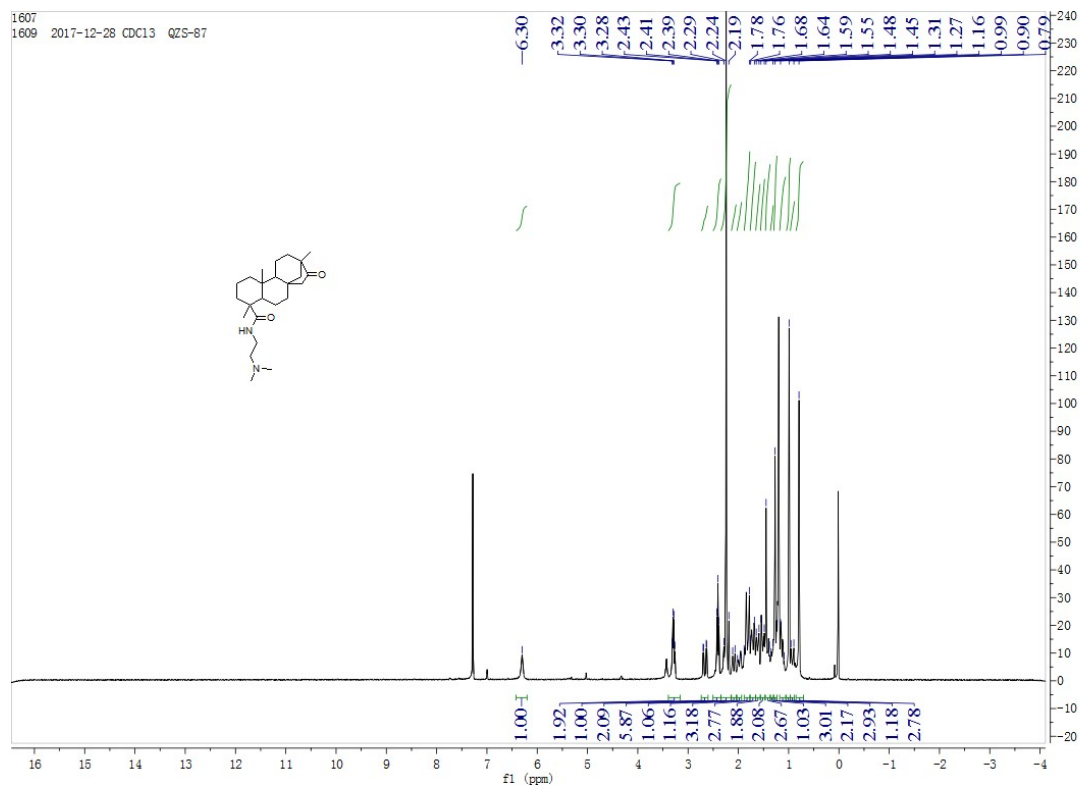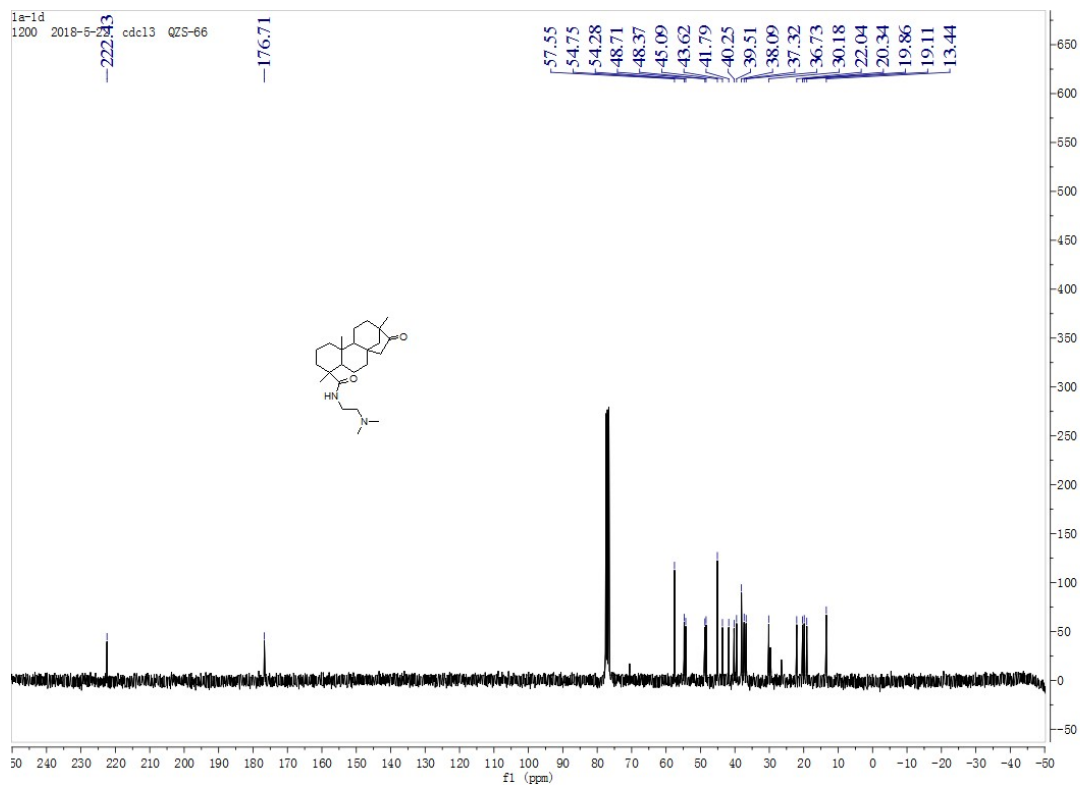

$^1\text{H}$  NMR and  $^{13}\text{C}$  NMR spectra of compound **2a**

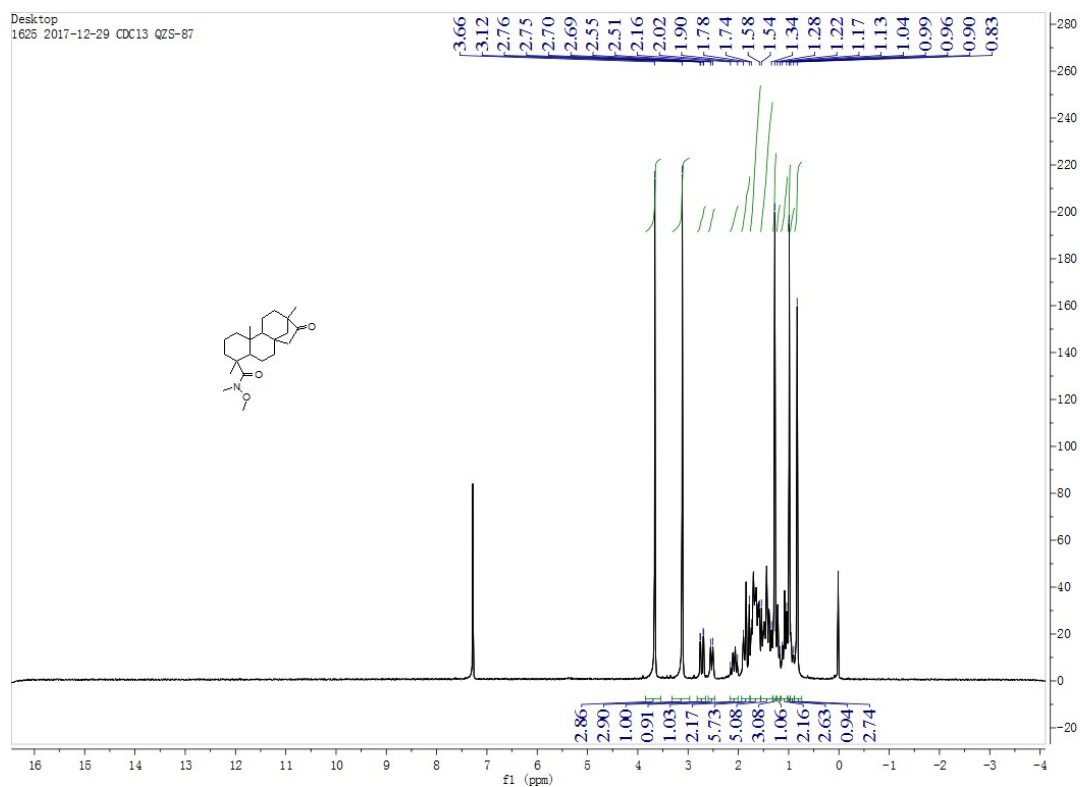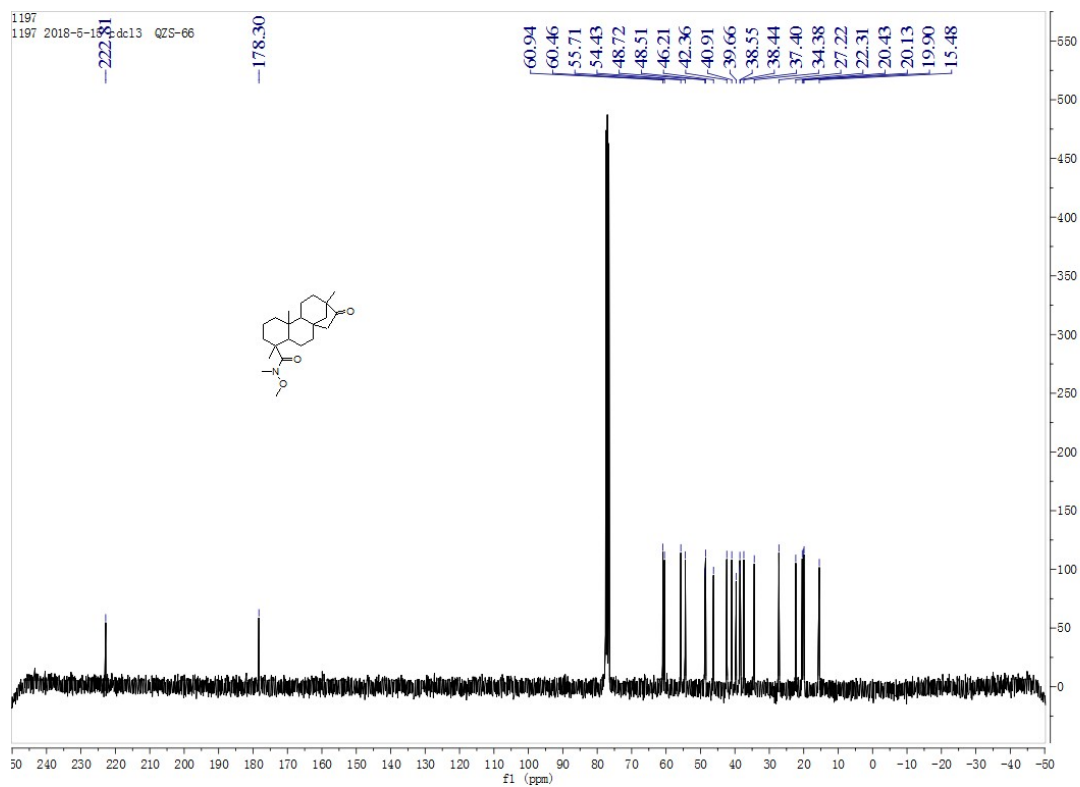

$^1\text{H}$  NMR and  $^{13}\text{C}$  NMR spectra of compound **1c**

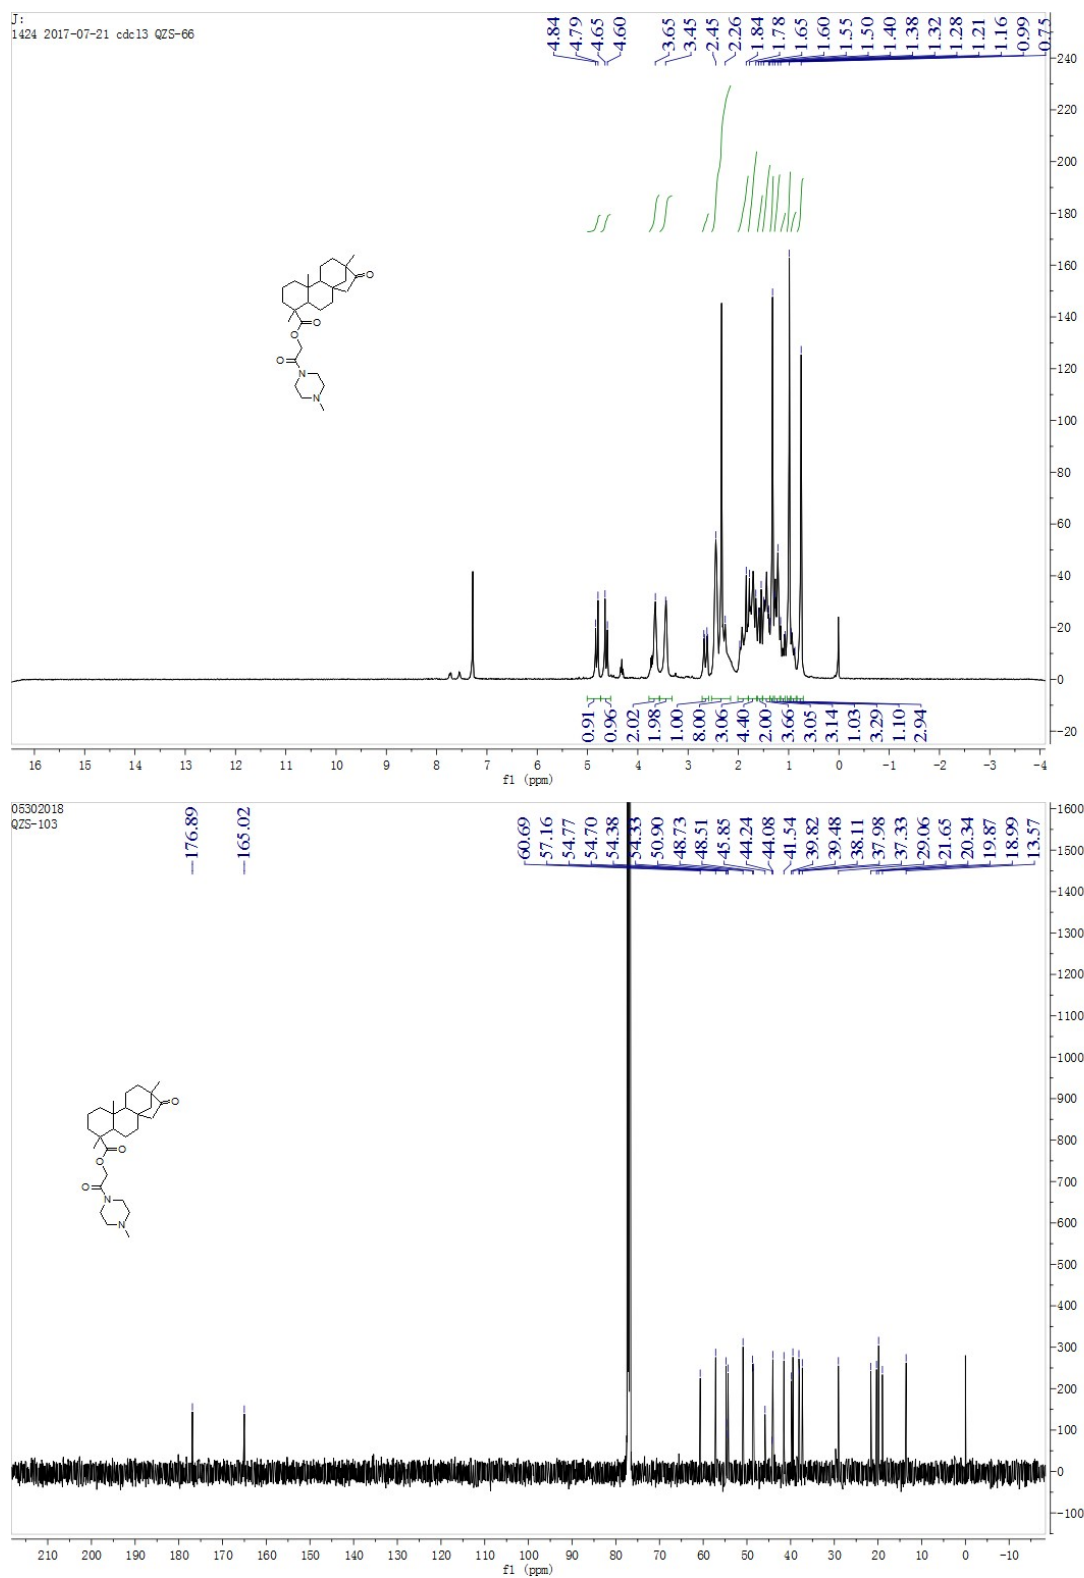

<sup>1</sup>H NMR and <sup>13</sup>C NMR spectra of compound **2a**

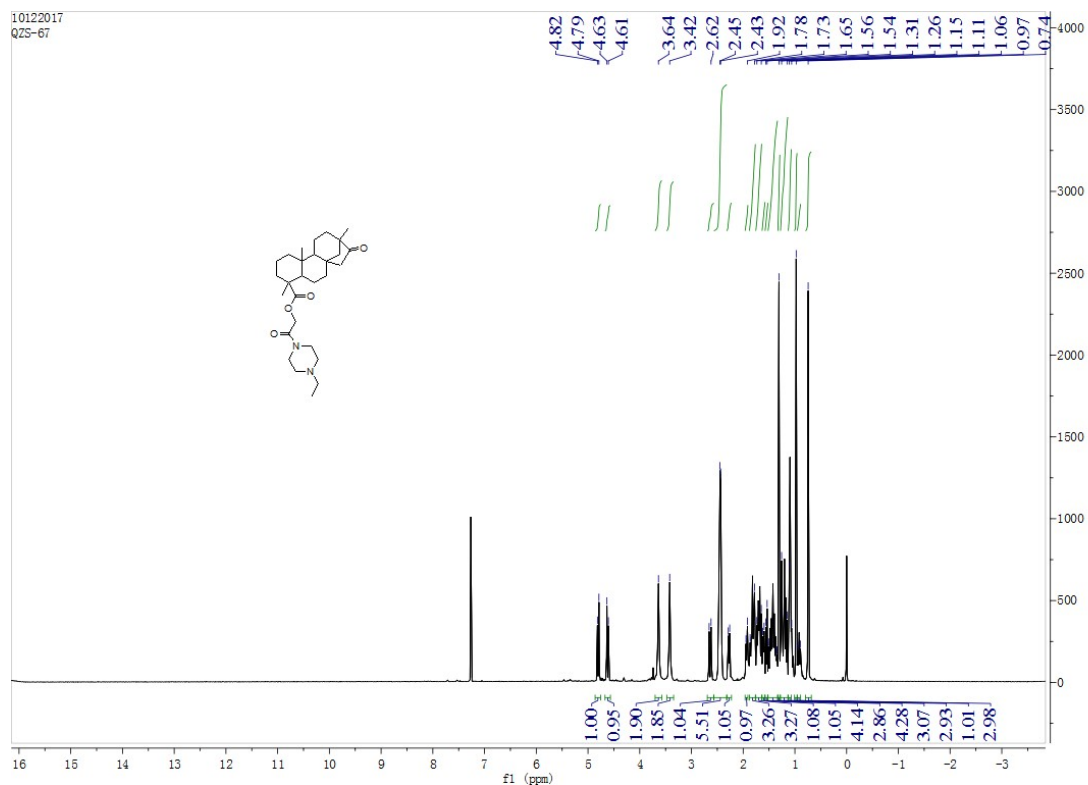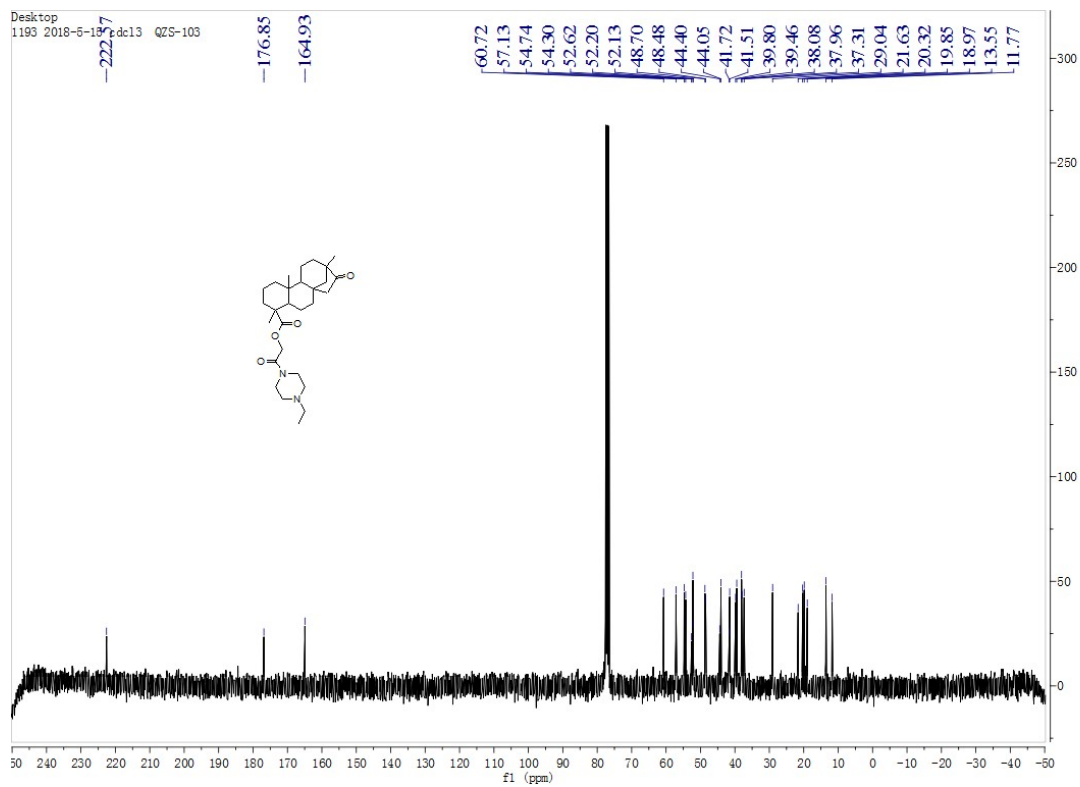

$^1\text{H}$  NMR and  $^{13}\text{C}$  NMR spectra of compound **2b**

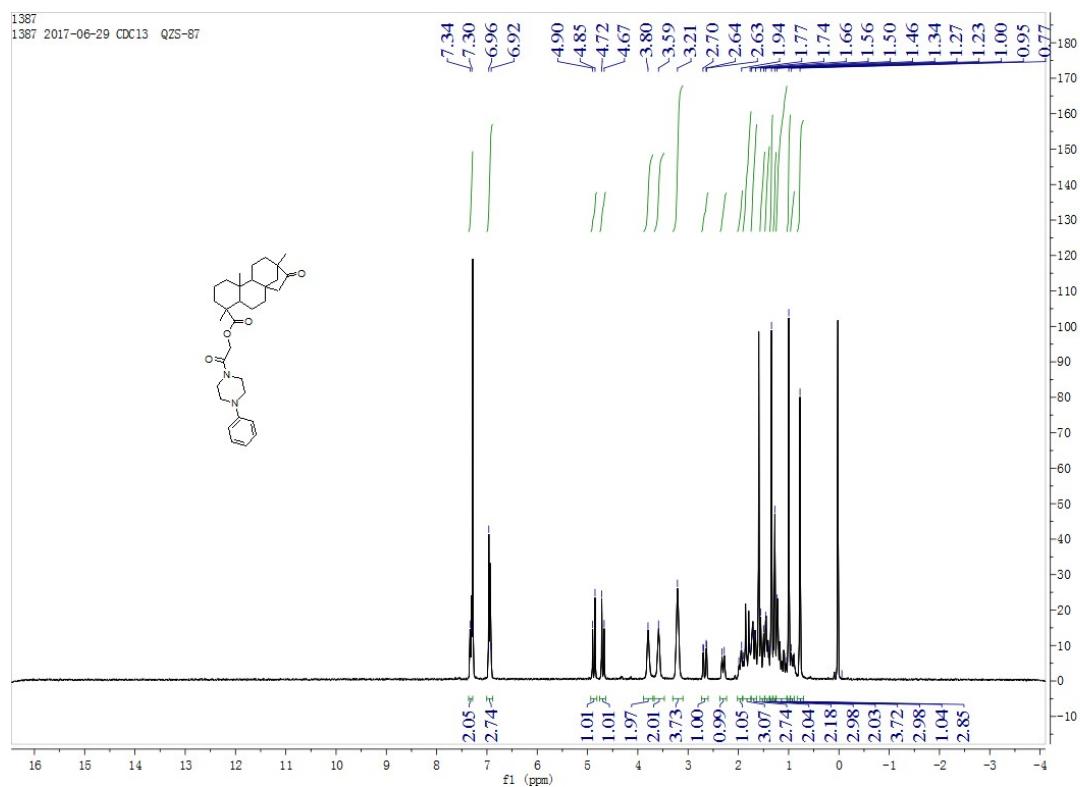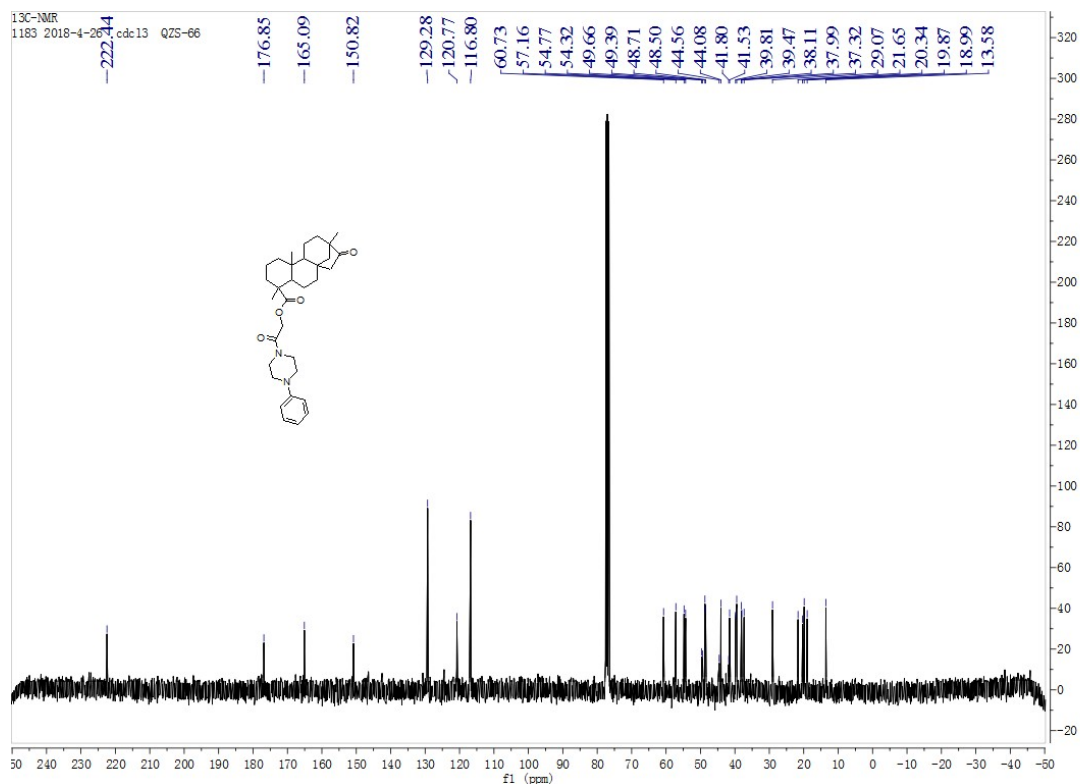

<sup>1</sup>H NMR and <sup>13</sup>C NMR spectra of compound **2c**

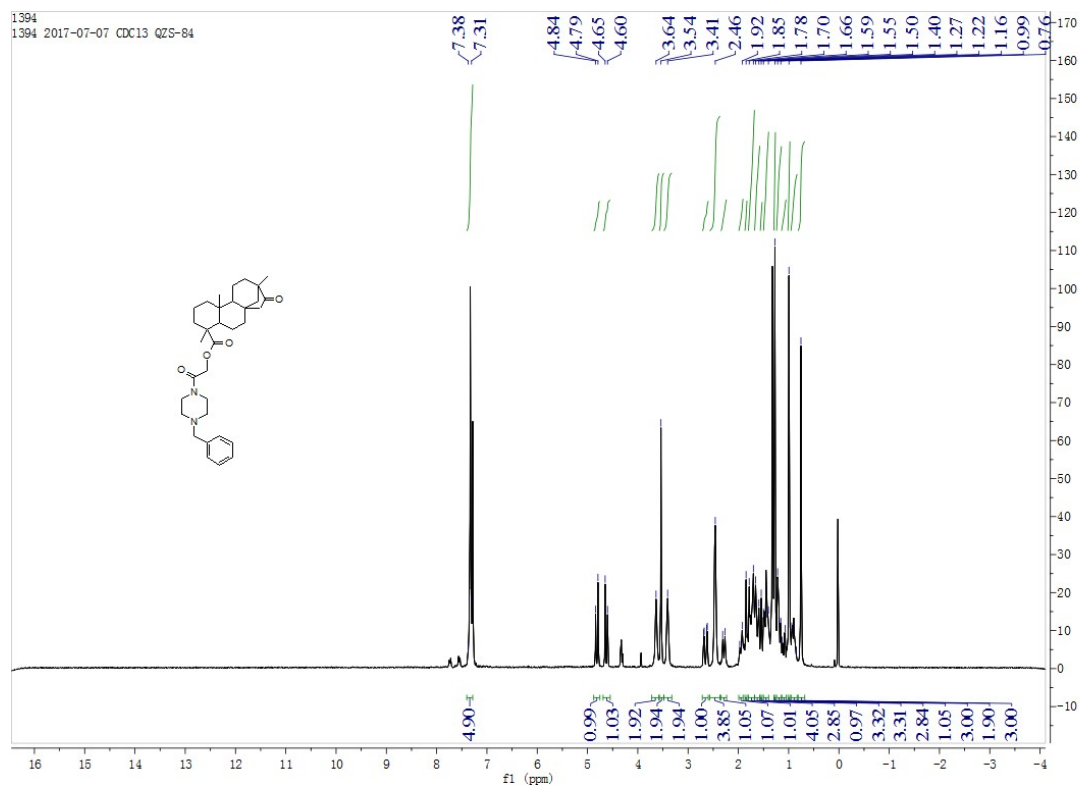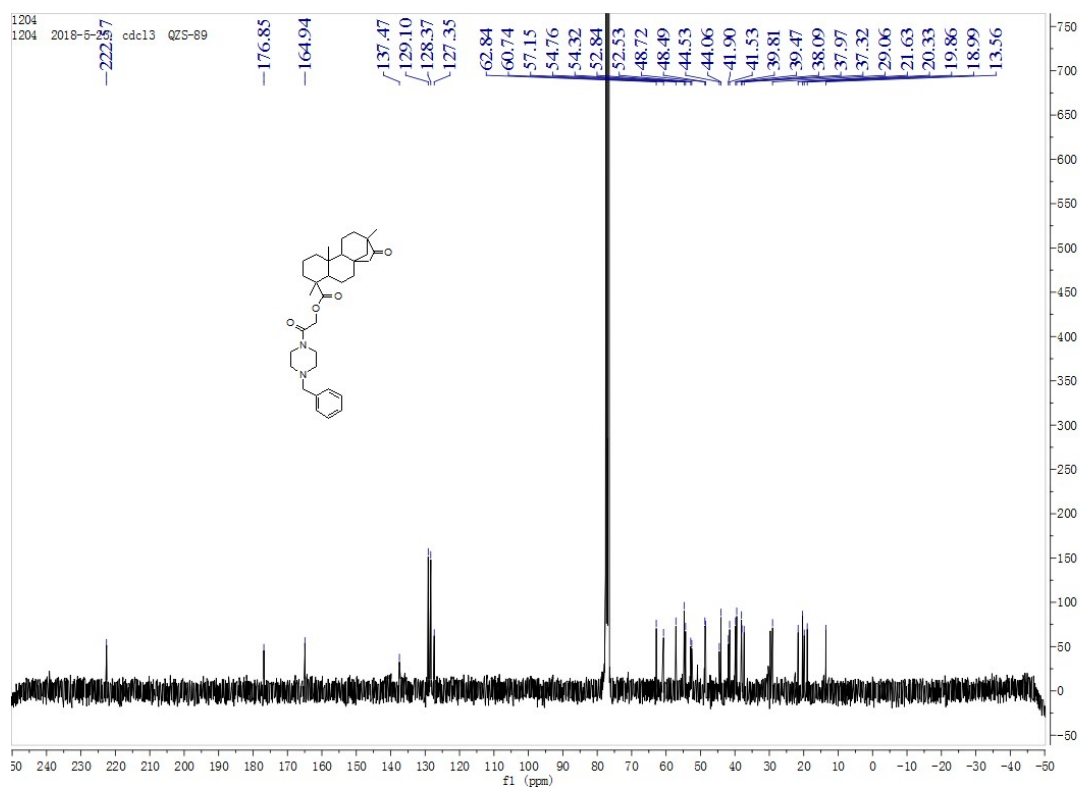

$^1\text{H}$  NMR and  $^{13}\text{C}$  NMR spectra of compound **2d**

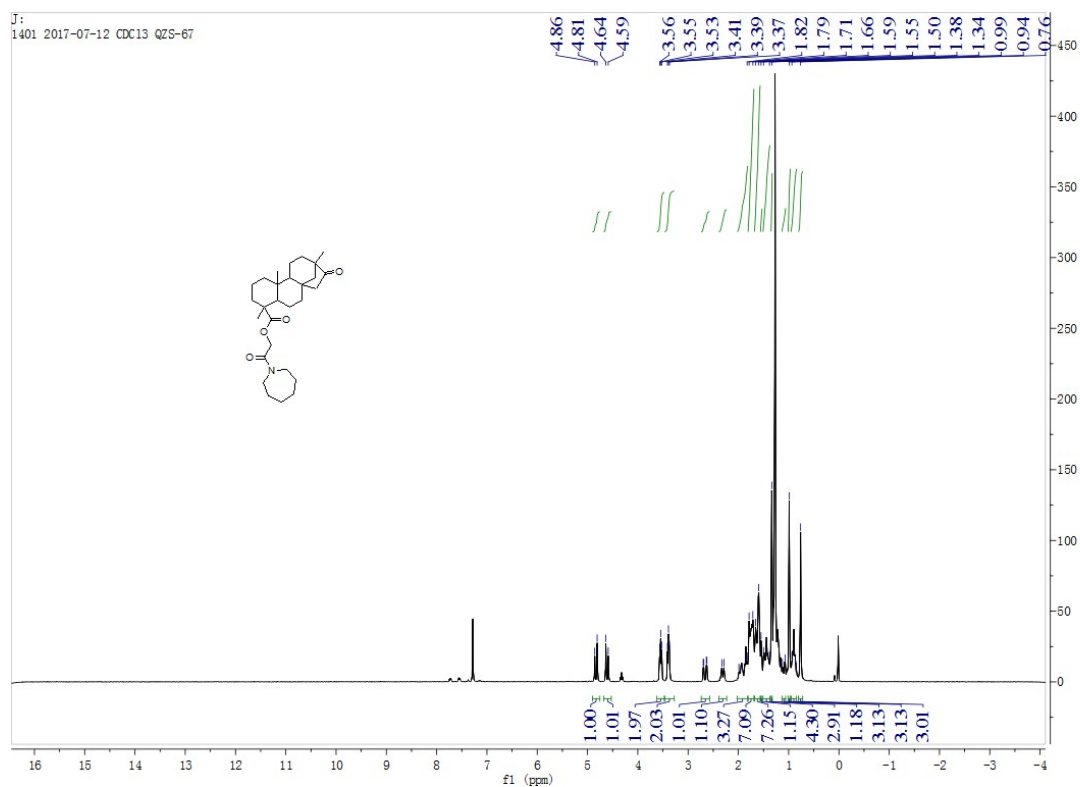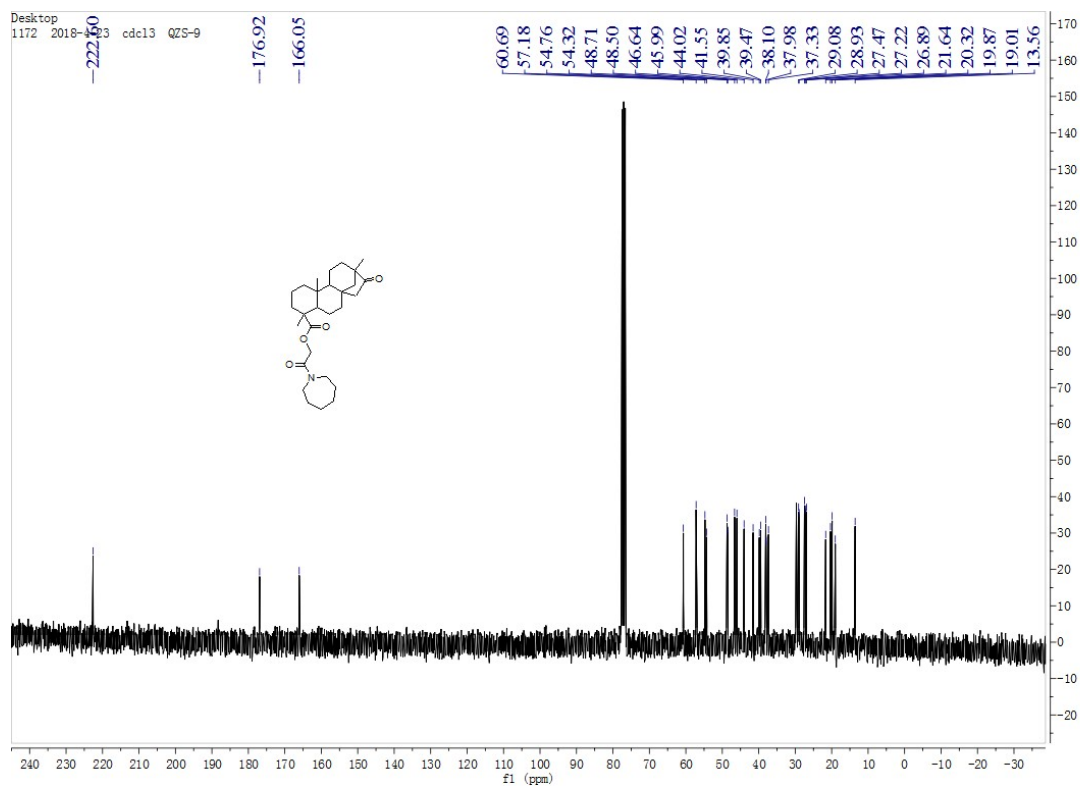

<sup>1</sup>H NMR and <sup>13</sup>C NMR spectra of compound **2e**

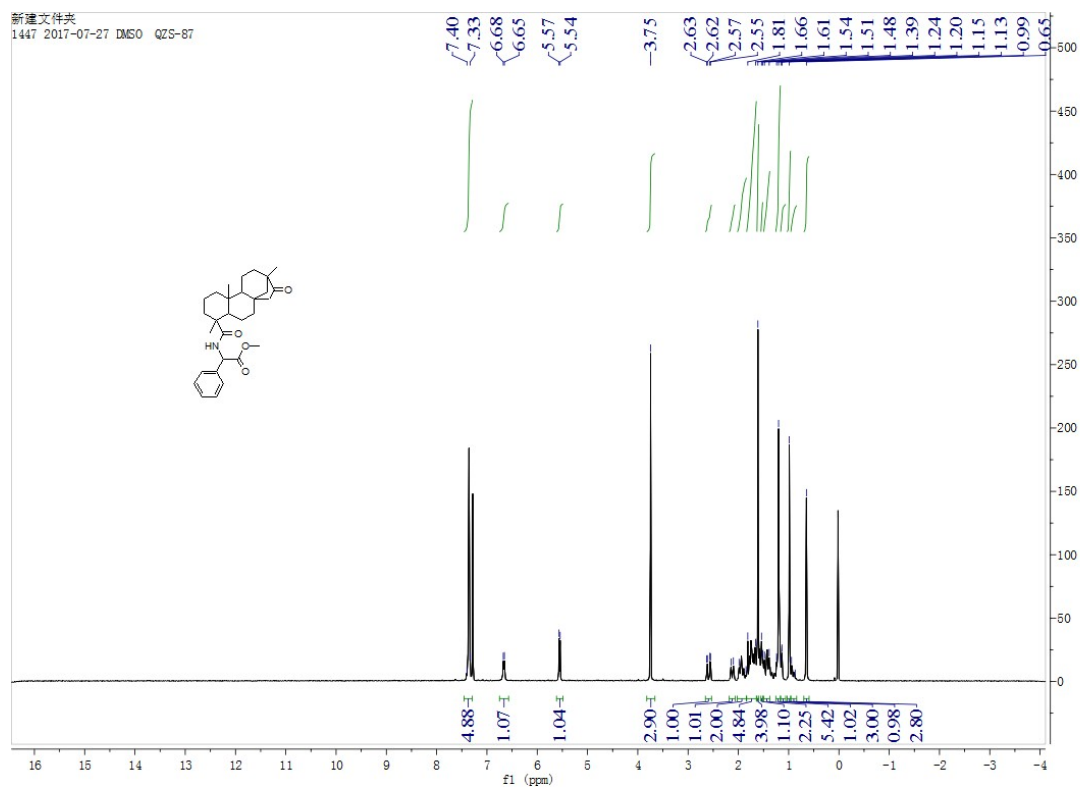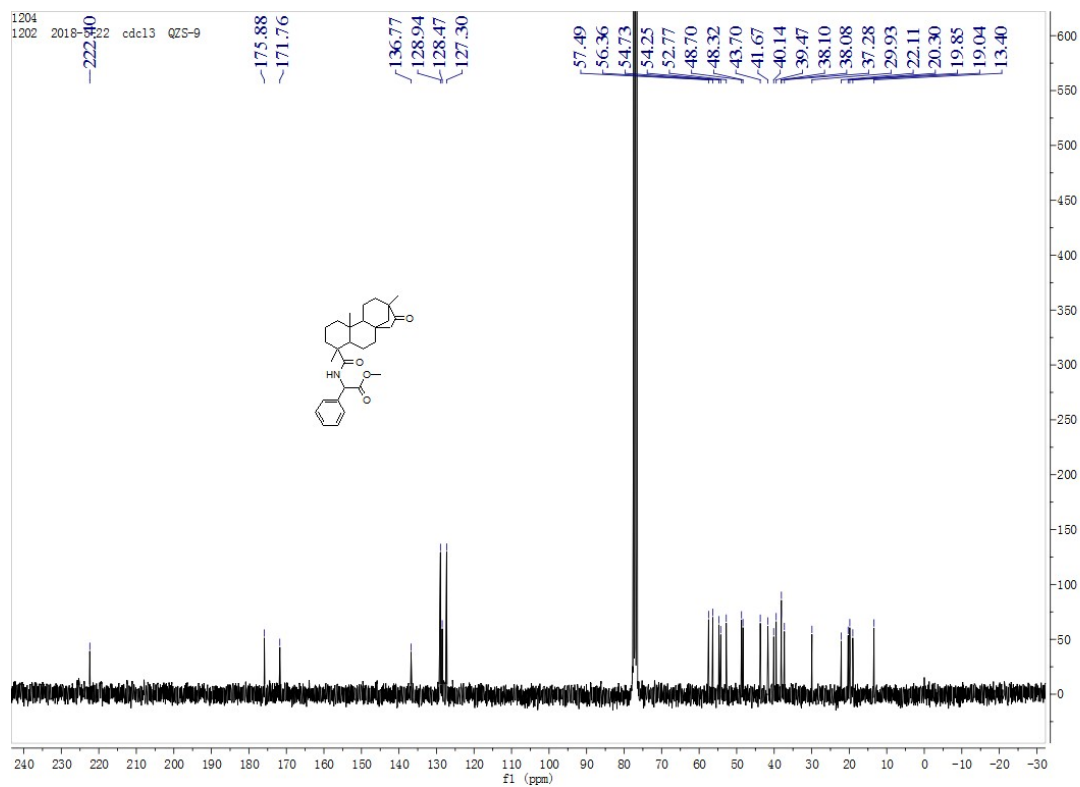

<sup>1</sup>H NMR and <sup>13</sup>C NMR spectra of compound **3a**

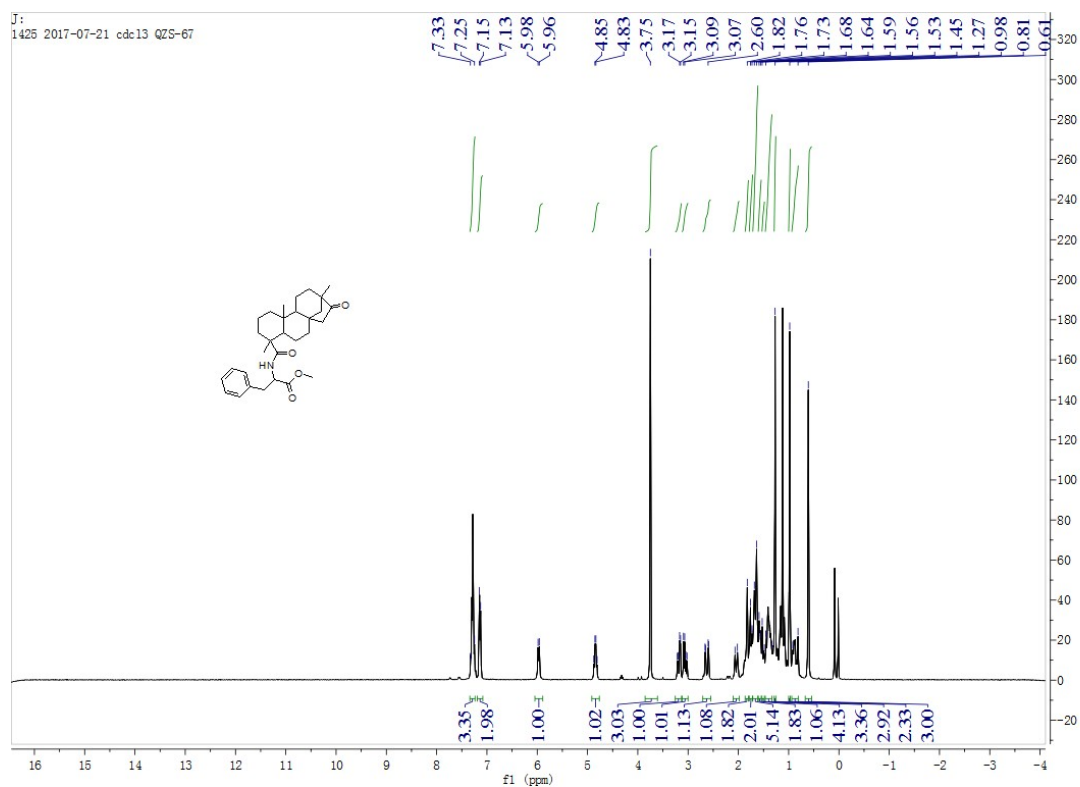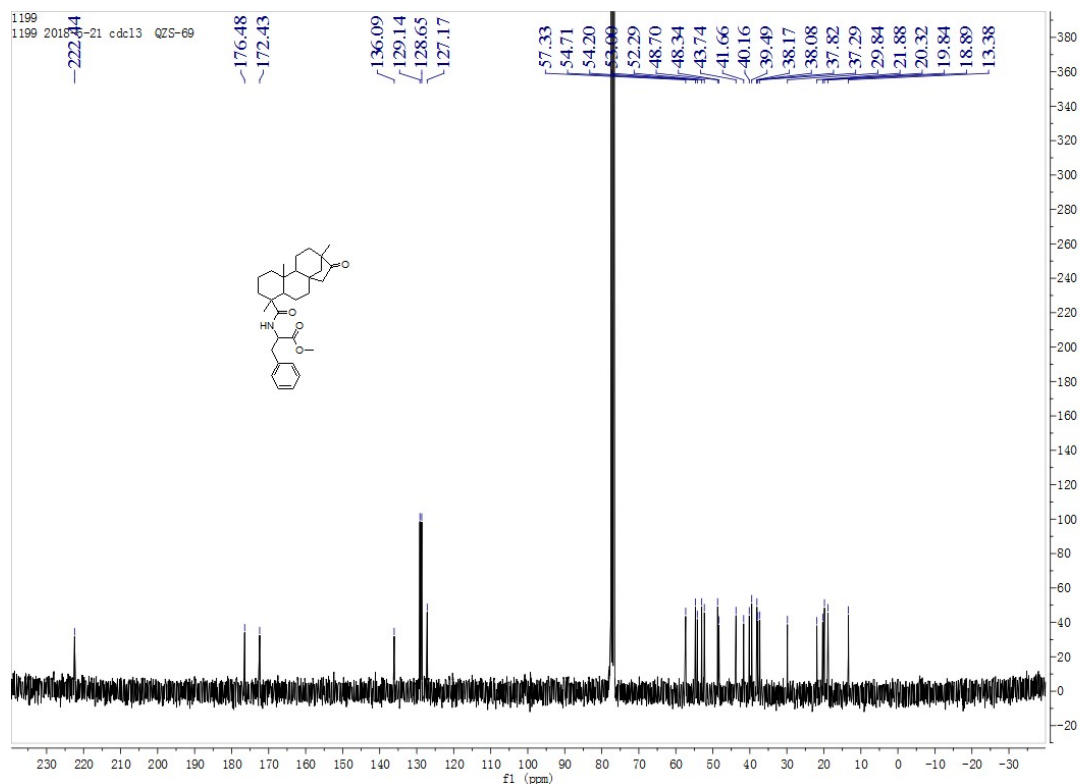

$^1\text{H}$  NMR and  $^{13}\text{C}$  NMR spectra of compound **3b**

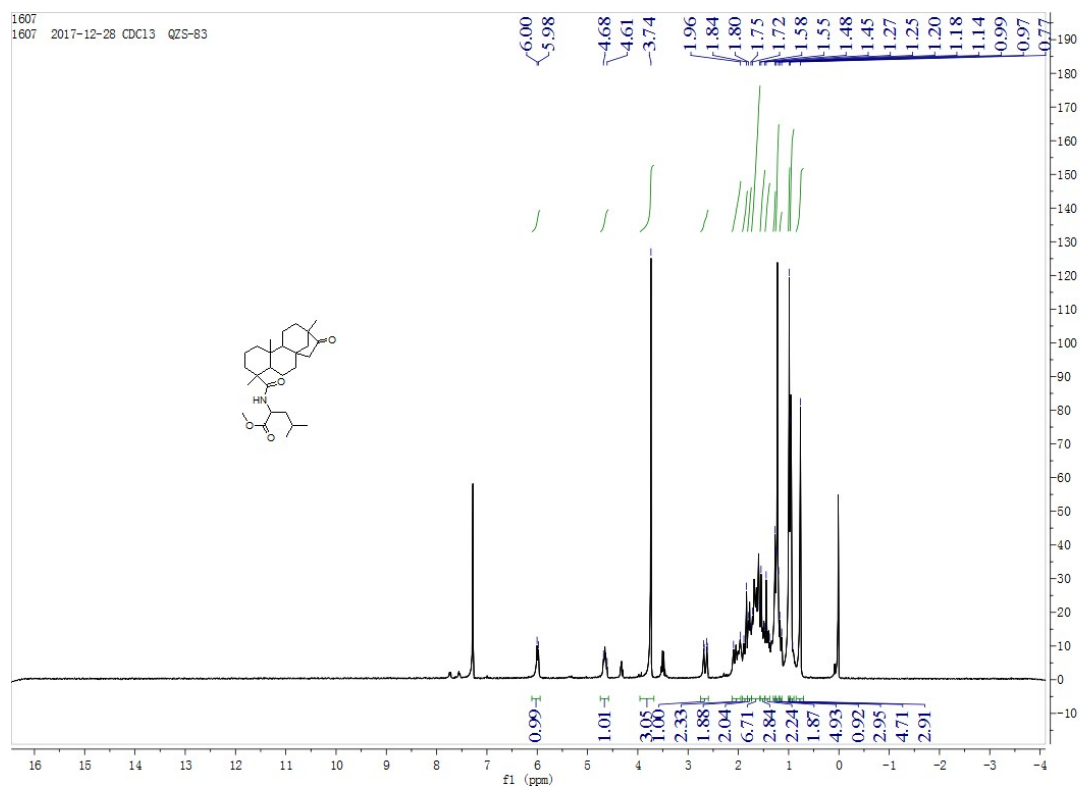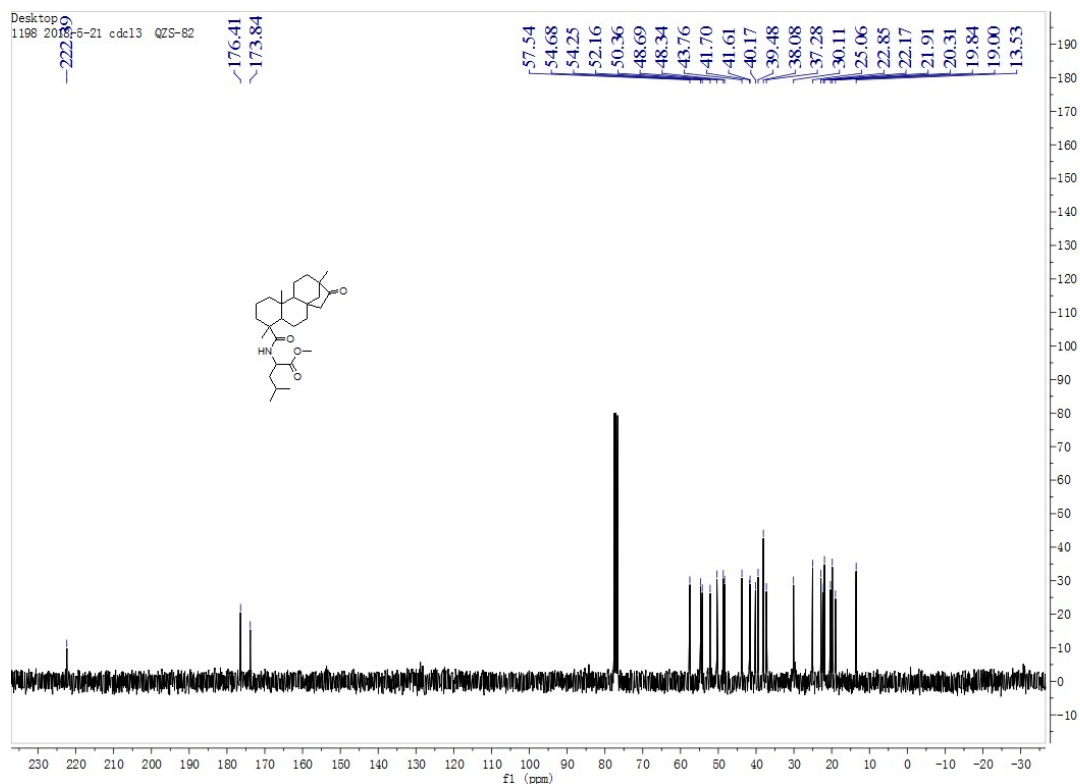

$^1\text{H}$  NMR and  $^{13}\text{C}$  NMR spectra of compound **3c**

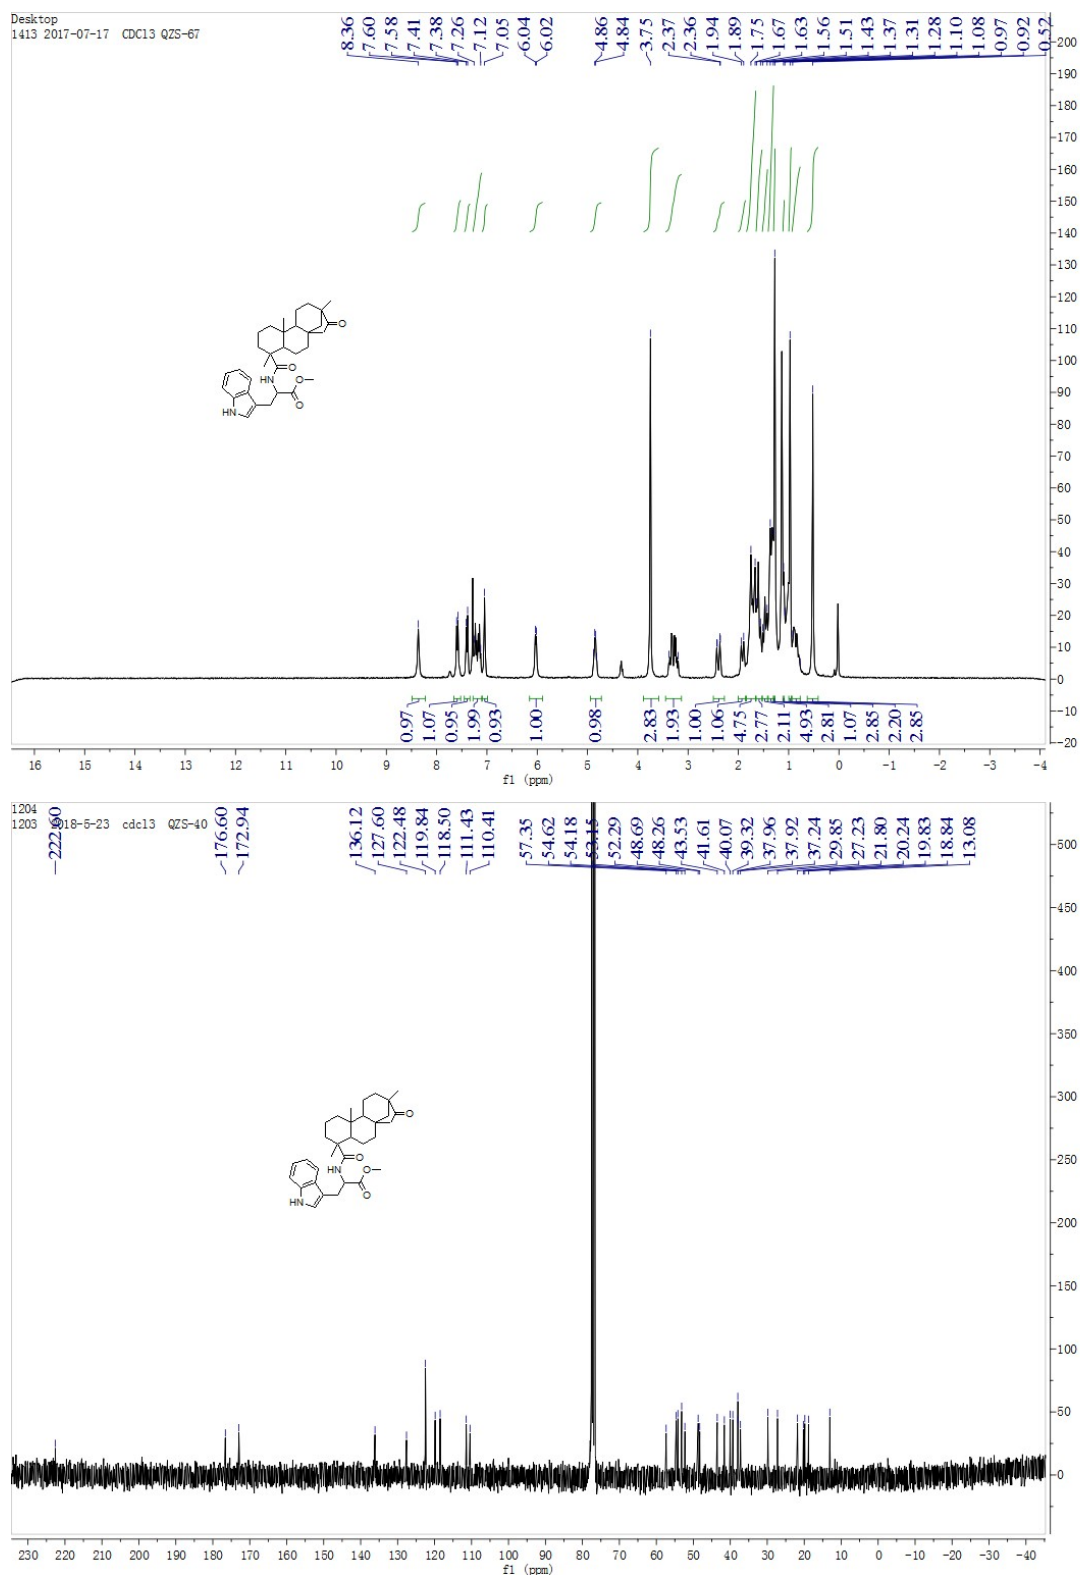

<sup>1</sup>H NMR and <sup>13</sup>C NMR spectra of compound **3d**

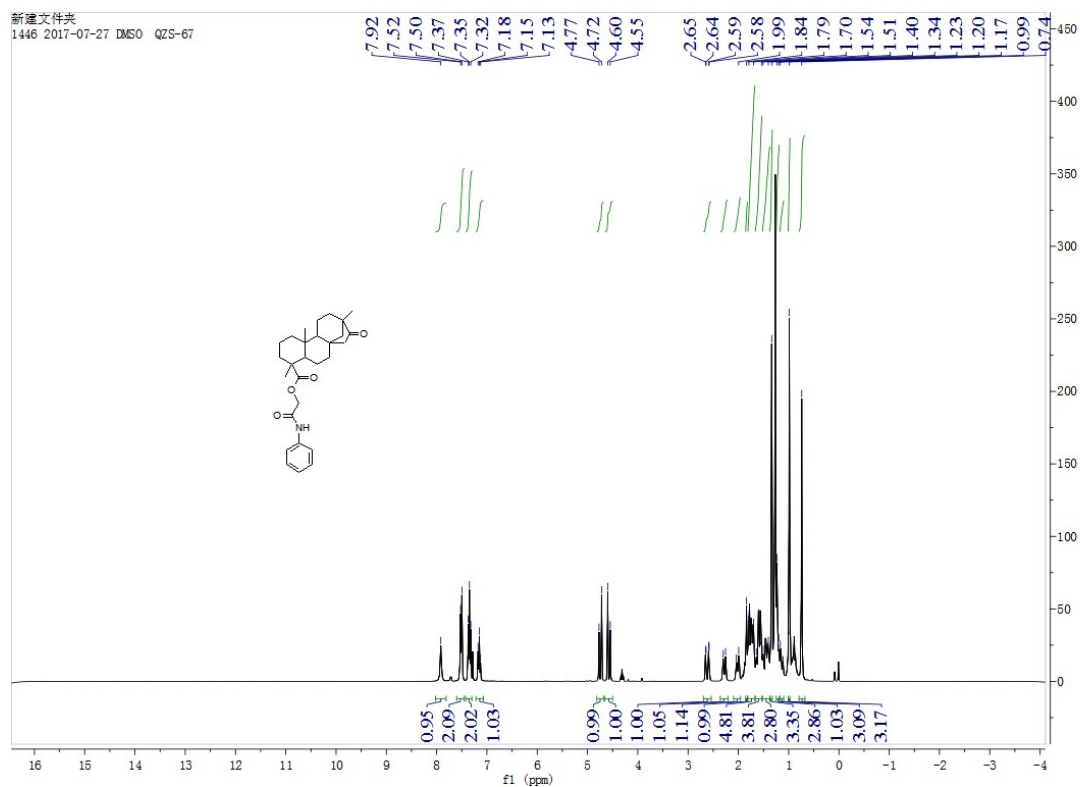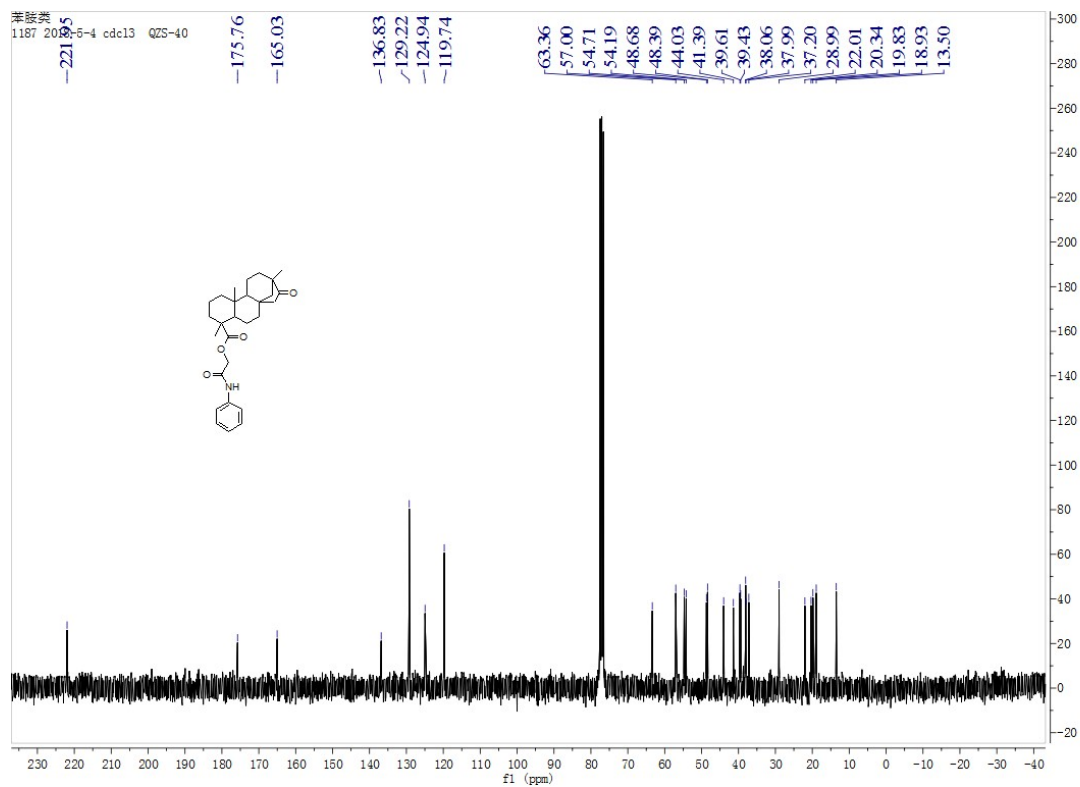

<sup>1</sup>H NMR and <sup>13</sup>C NMR spectra of compound 4a

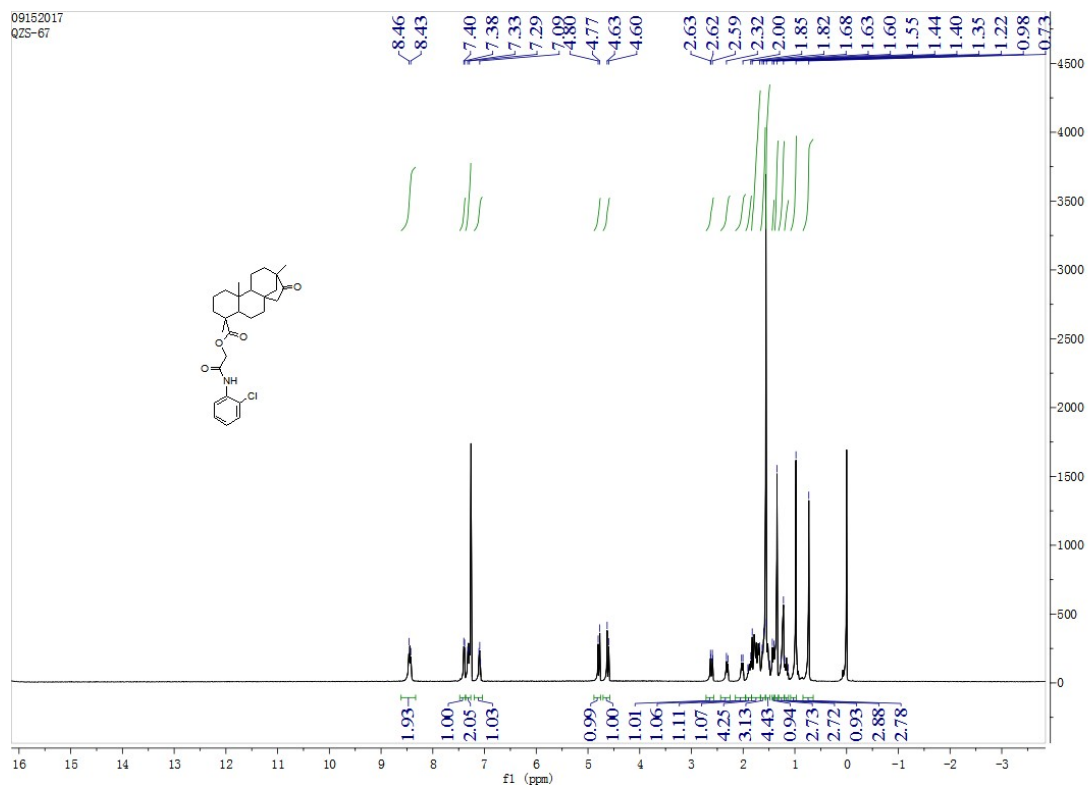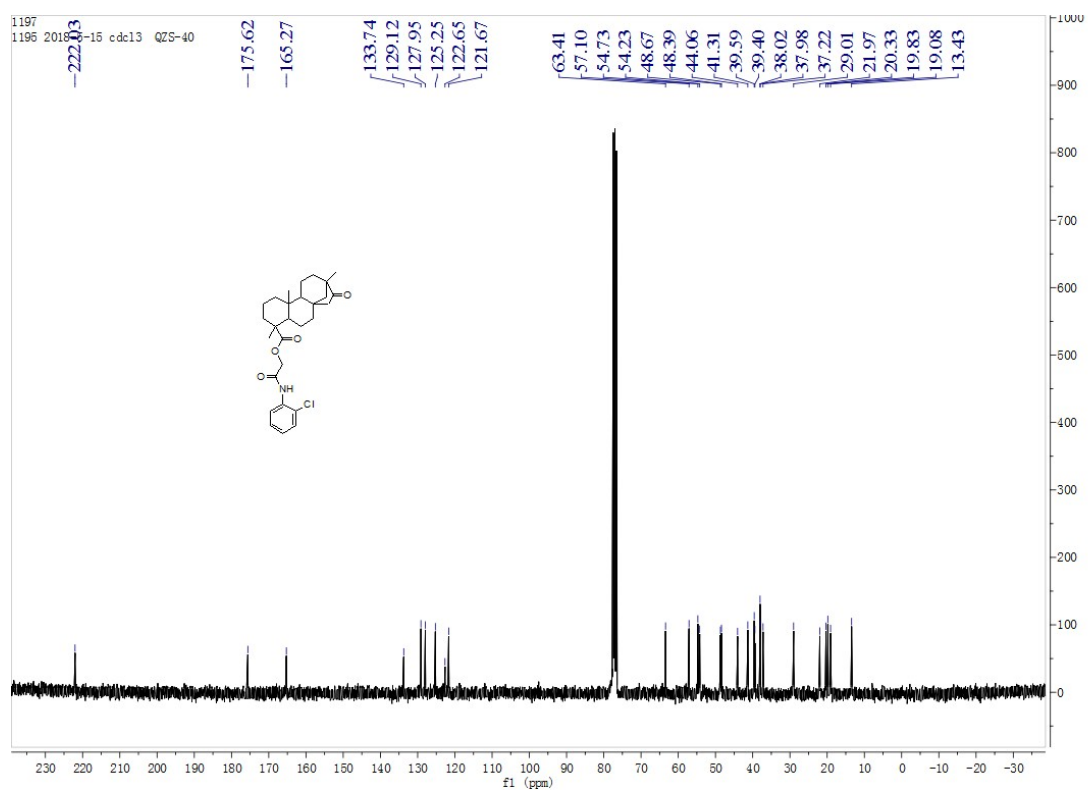

<sup>1</sup>H NMR and <sup>13</sup>C NMR spectra of compound **4b**

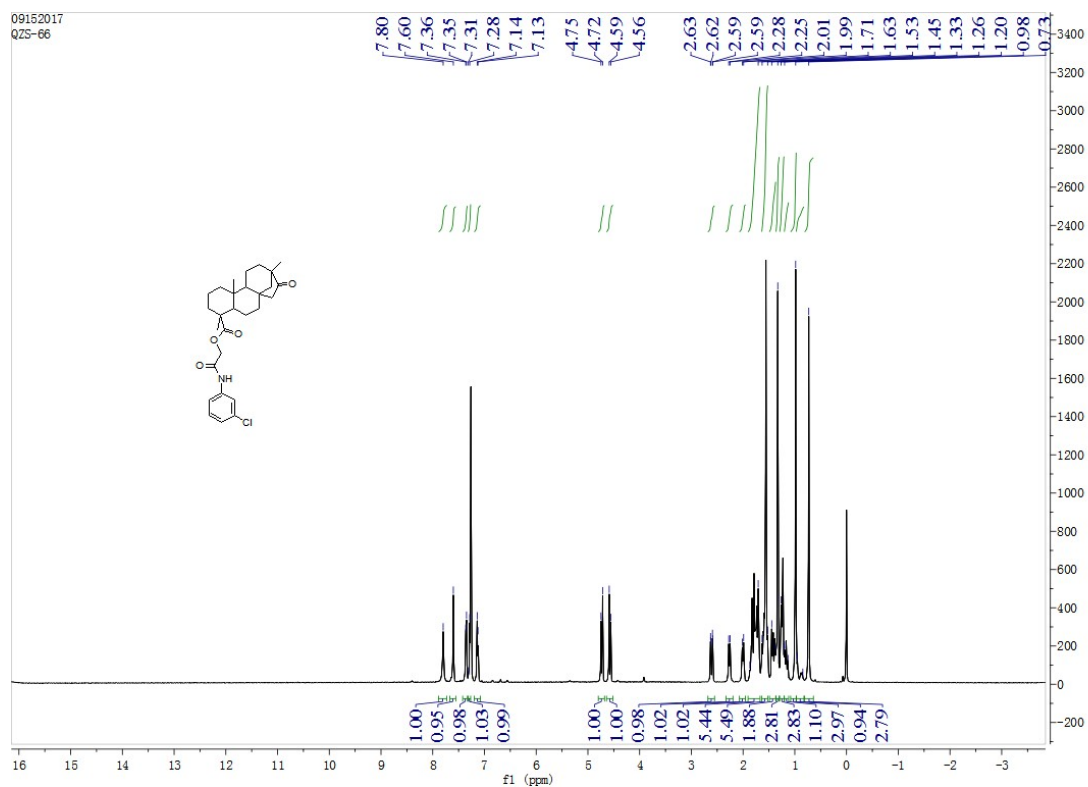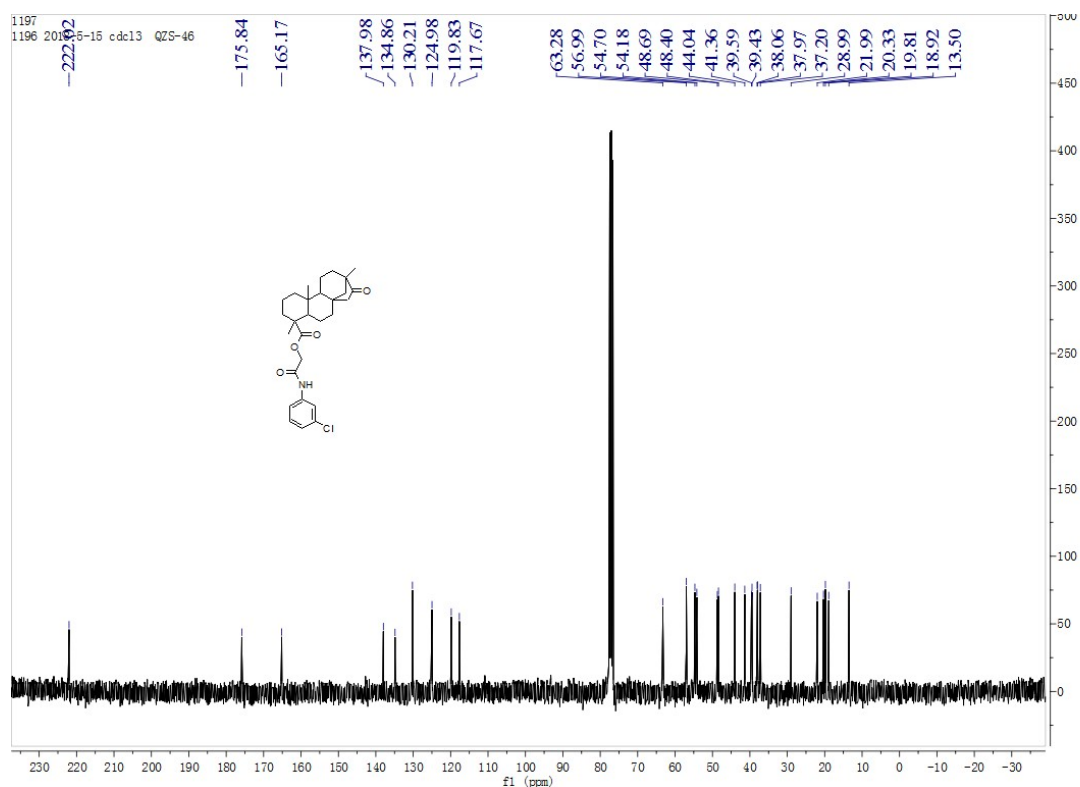

$^1\text{H}$  NMR and  $^{13}\text{C}$  NMR spectra of compound **4c**

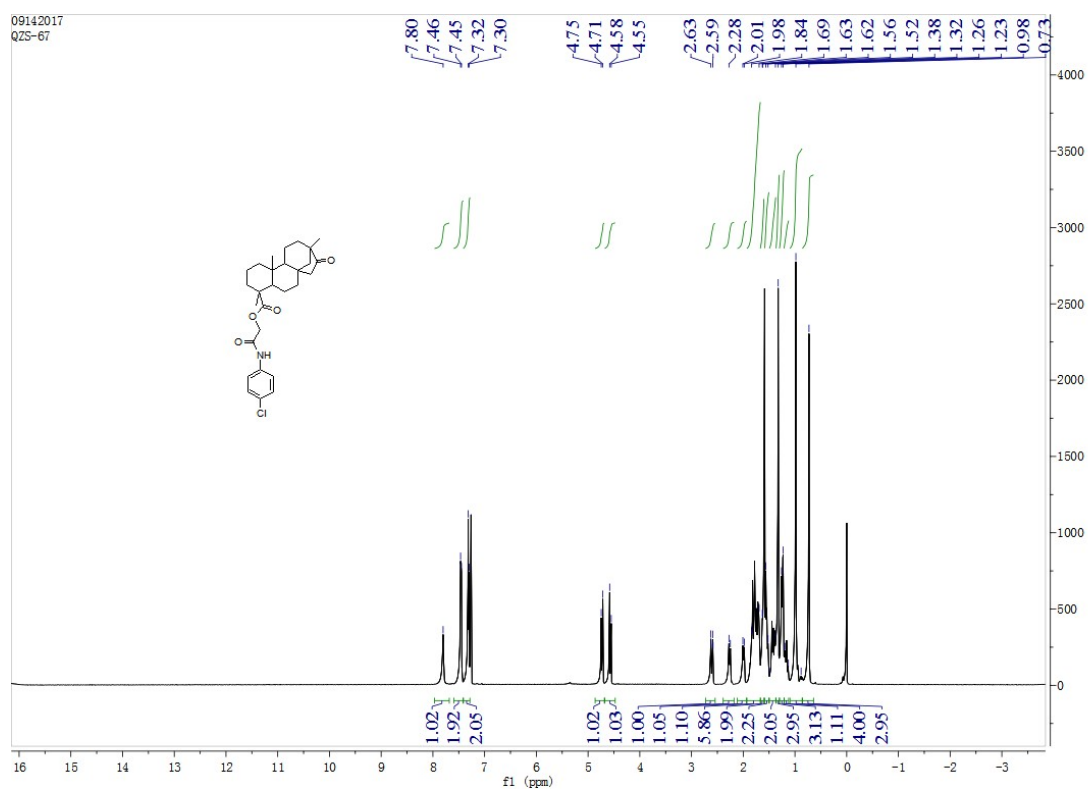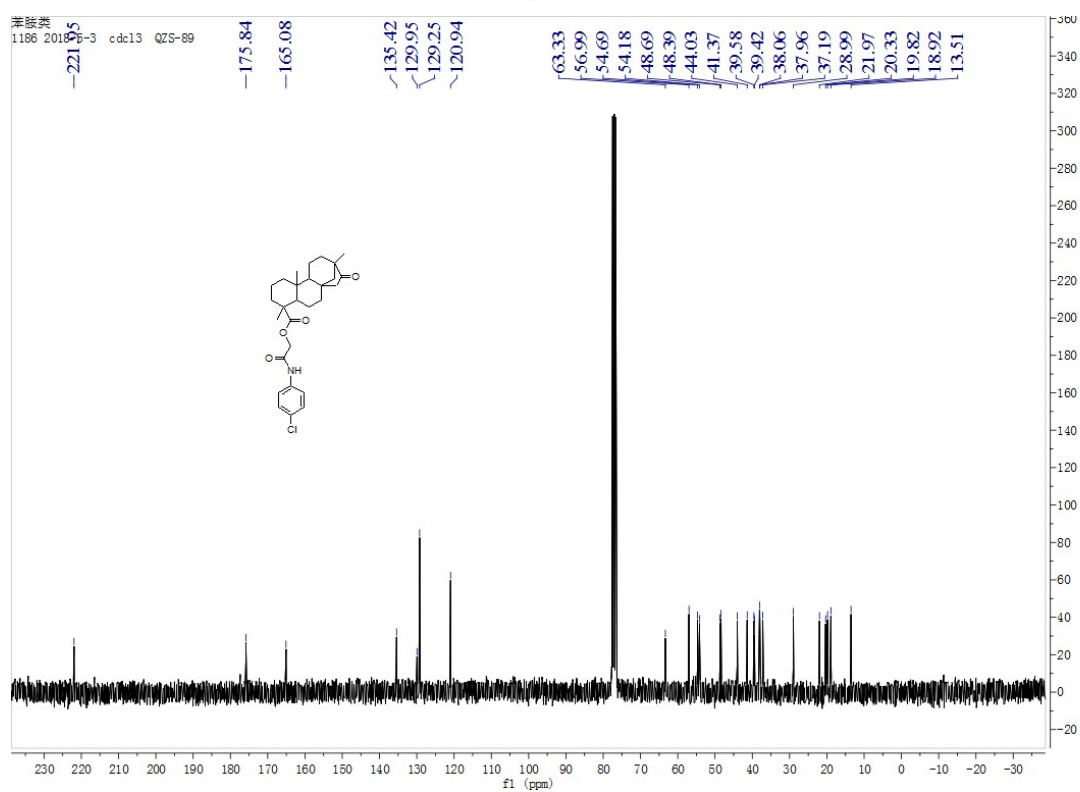

$^1\text{H}$  NMR and  $^{13}\text{C}$  NMR spectra of compound **4d**

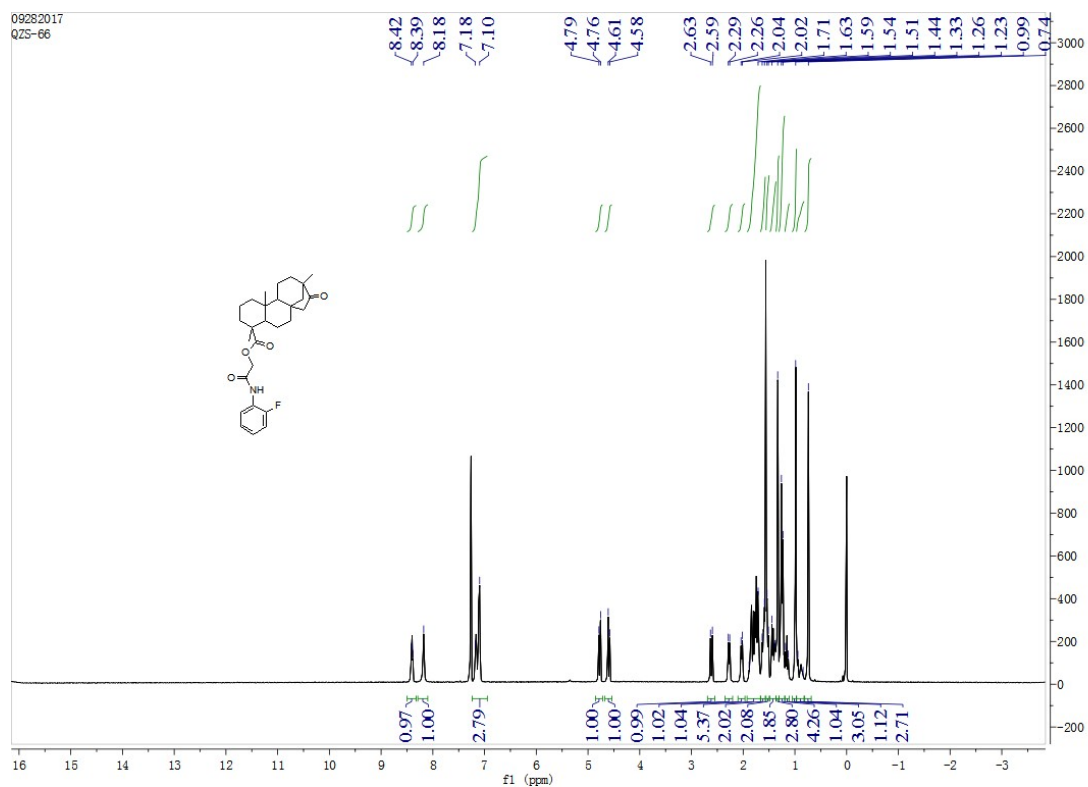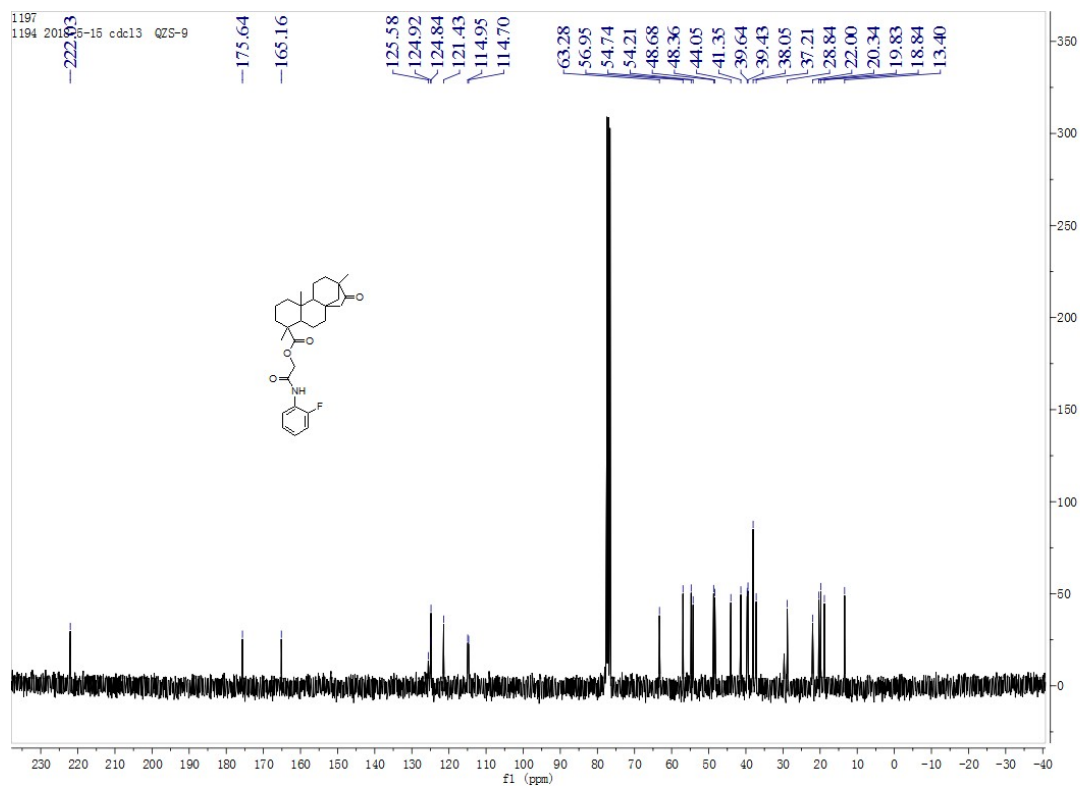

$^1\text{H}$  NMR and  $^{13}\text{C}$  NMR spectra of compound **4e**

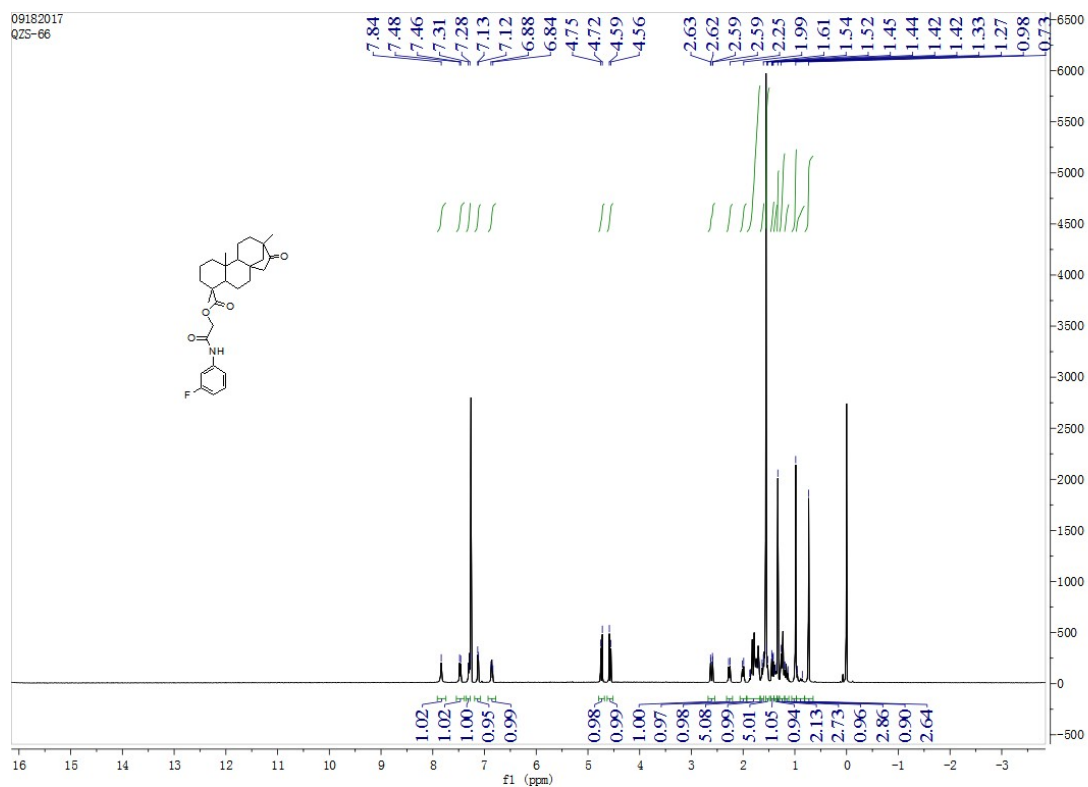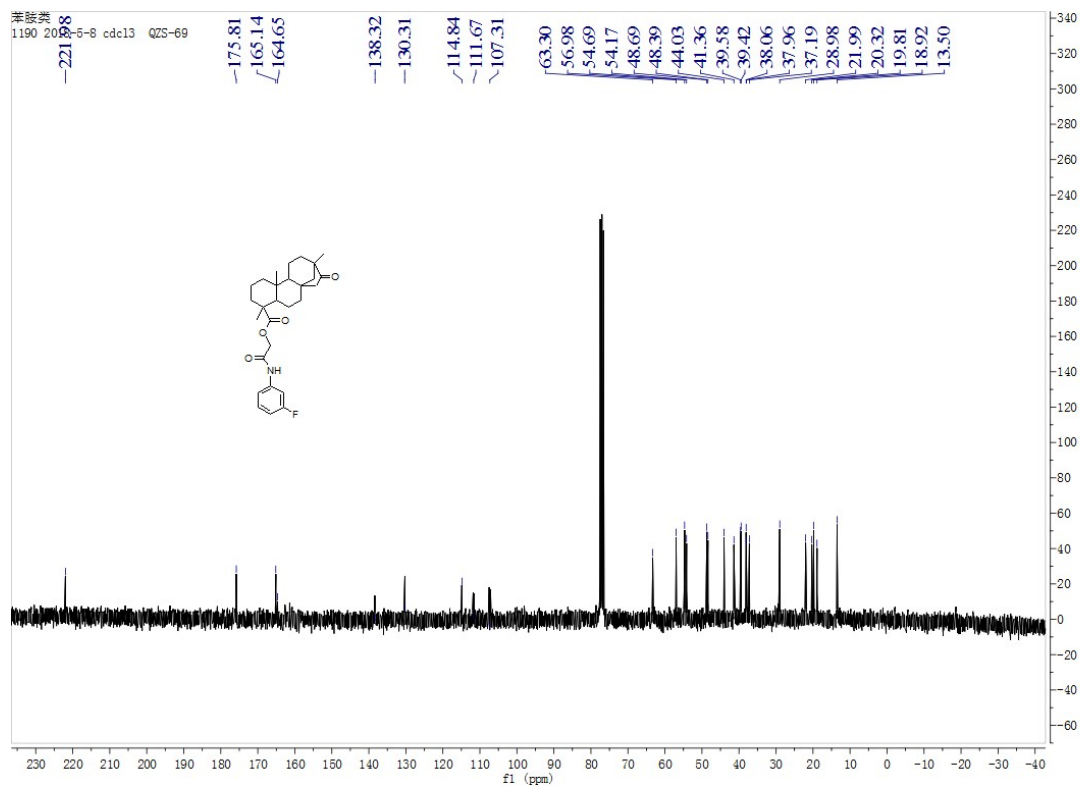

$^1\text{H}$  NMR and  $^{13}\text{C}$  NMR spectra of compound 4f

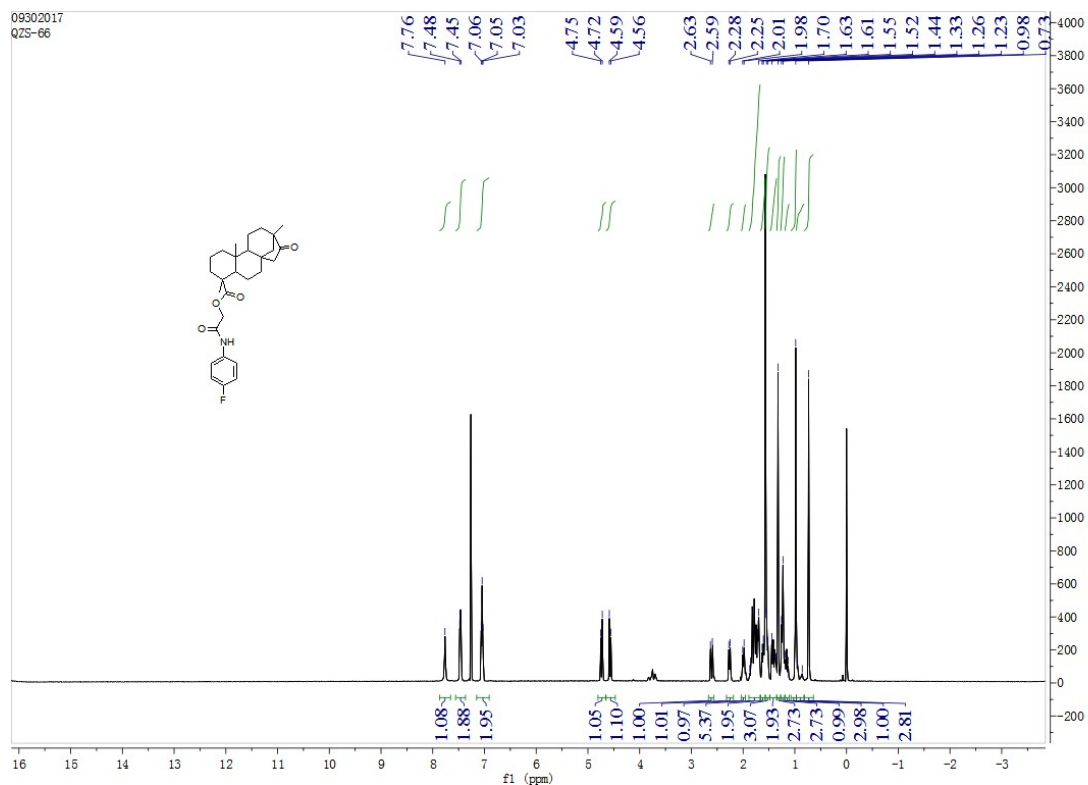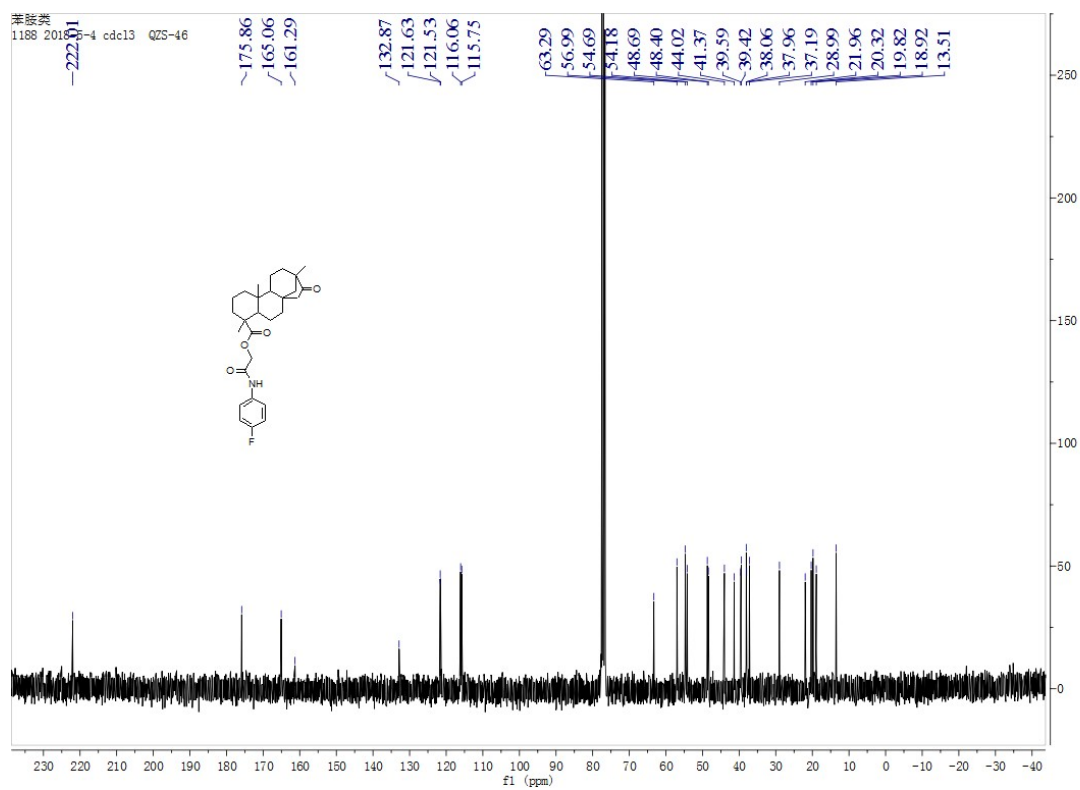

$^1\text{H}$  NMR and  $^{13}\text{C}$  NMR spectra of compound **4g**

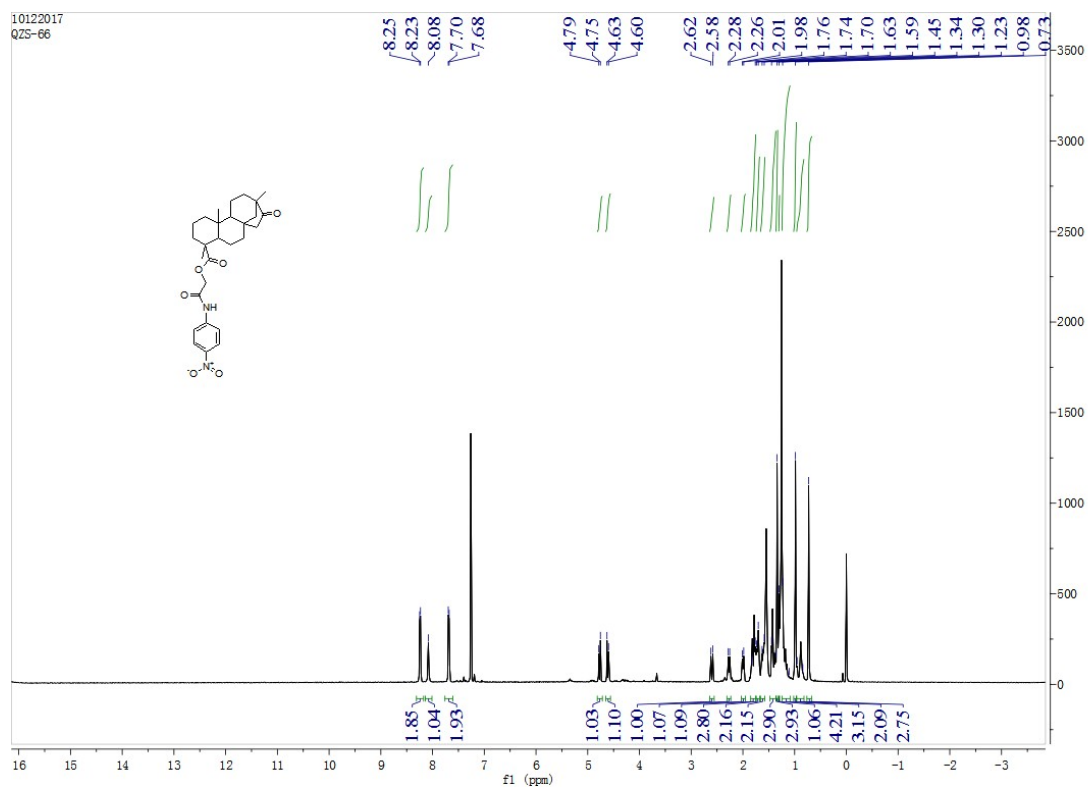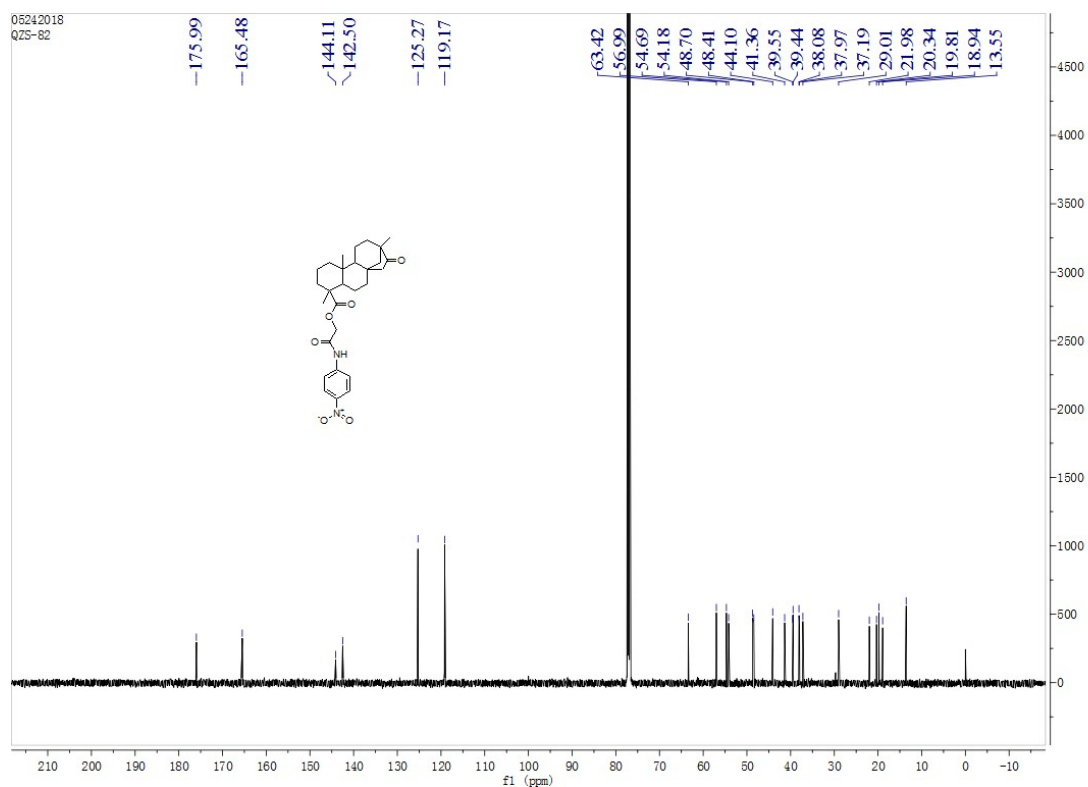

$^1\text{H}$  NMR and  $^{13}\text{C}$  NMR spectra of compound **4h**

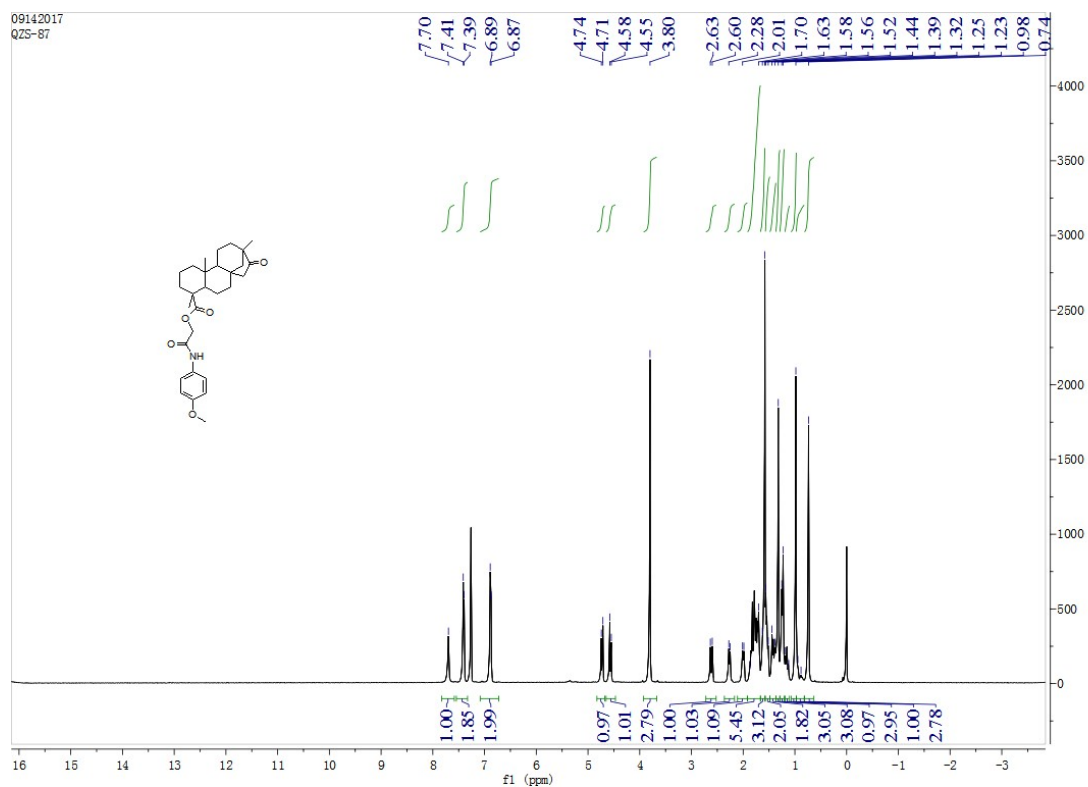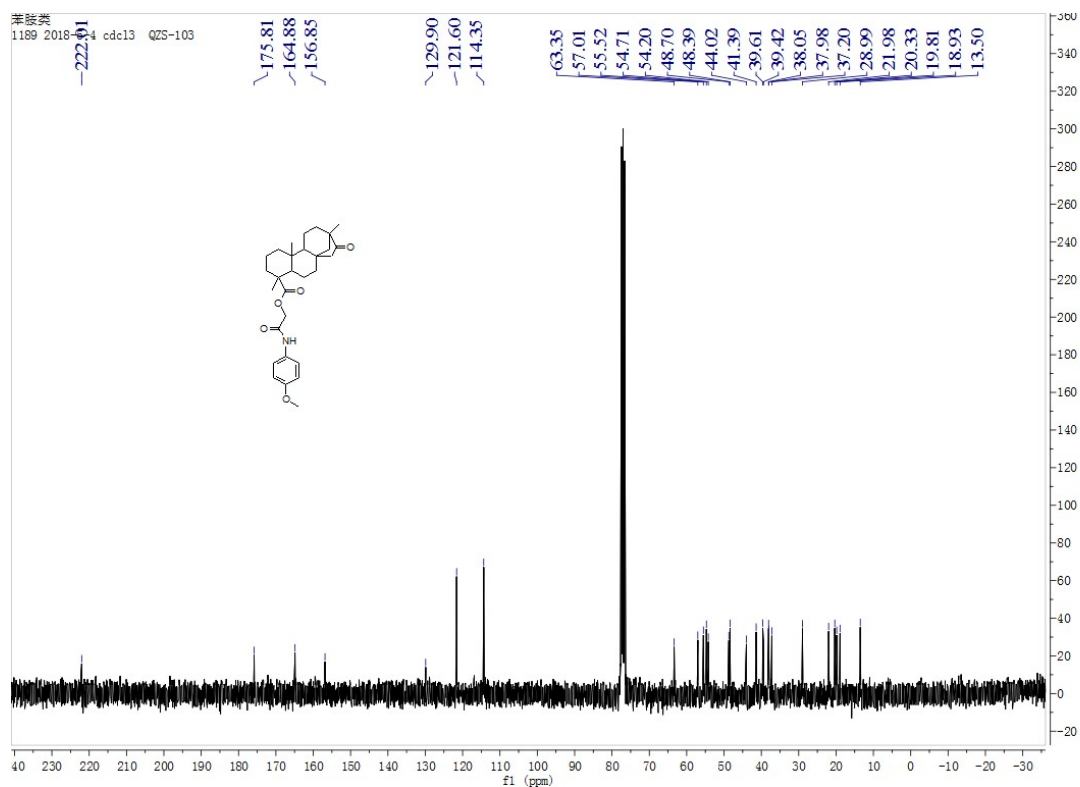

<sup>1</sup>H NMR and <sup>13</sup>C NMR spectra of compound **4i**

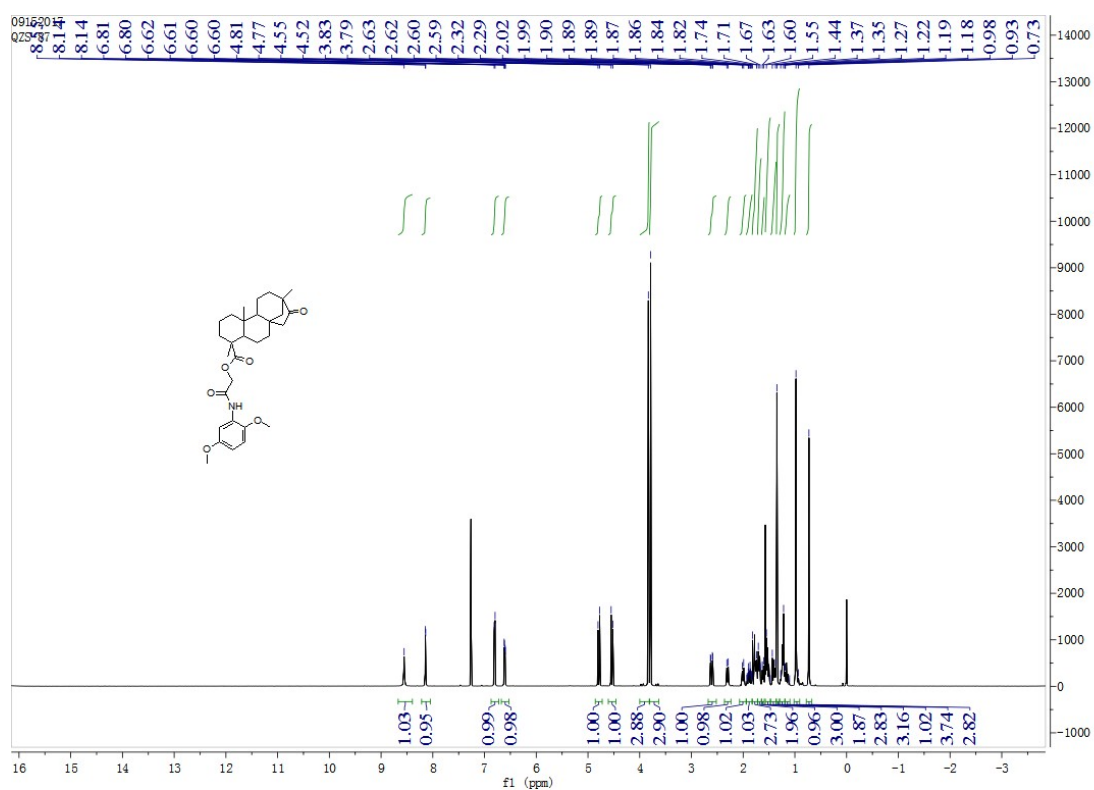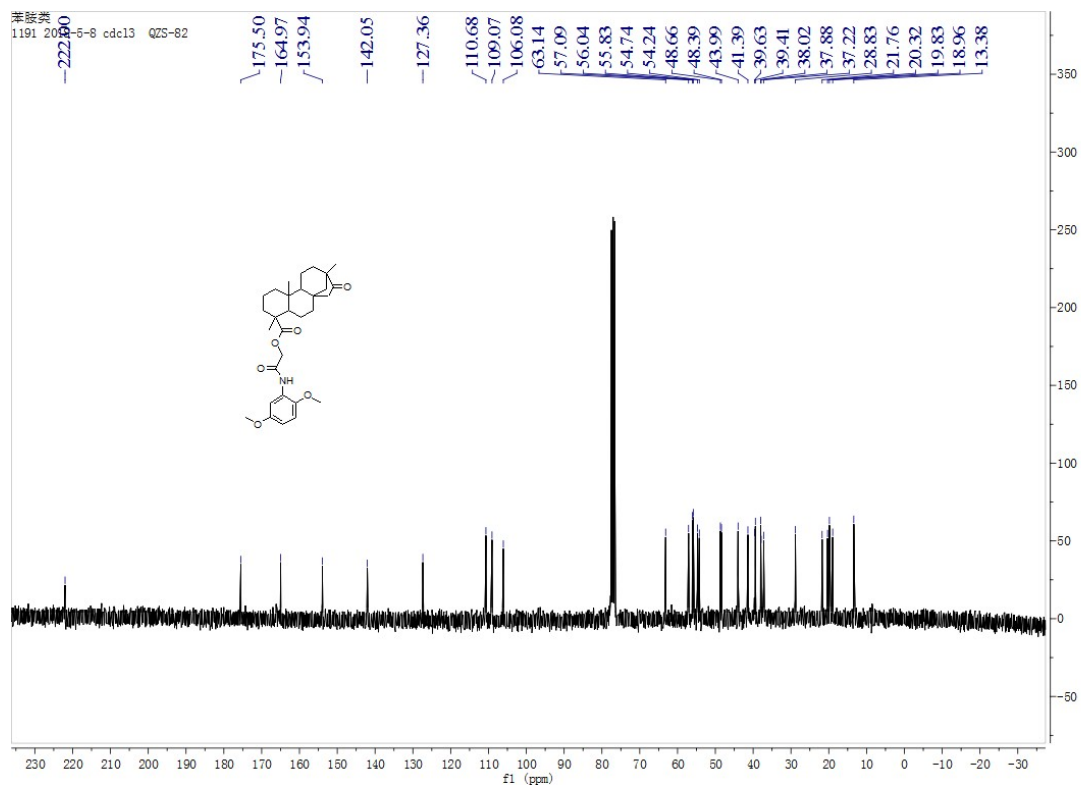

<sup>1</sup>H NMR and <sup>13</sup>C NMR spectra of compound **4j**

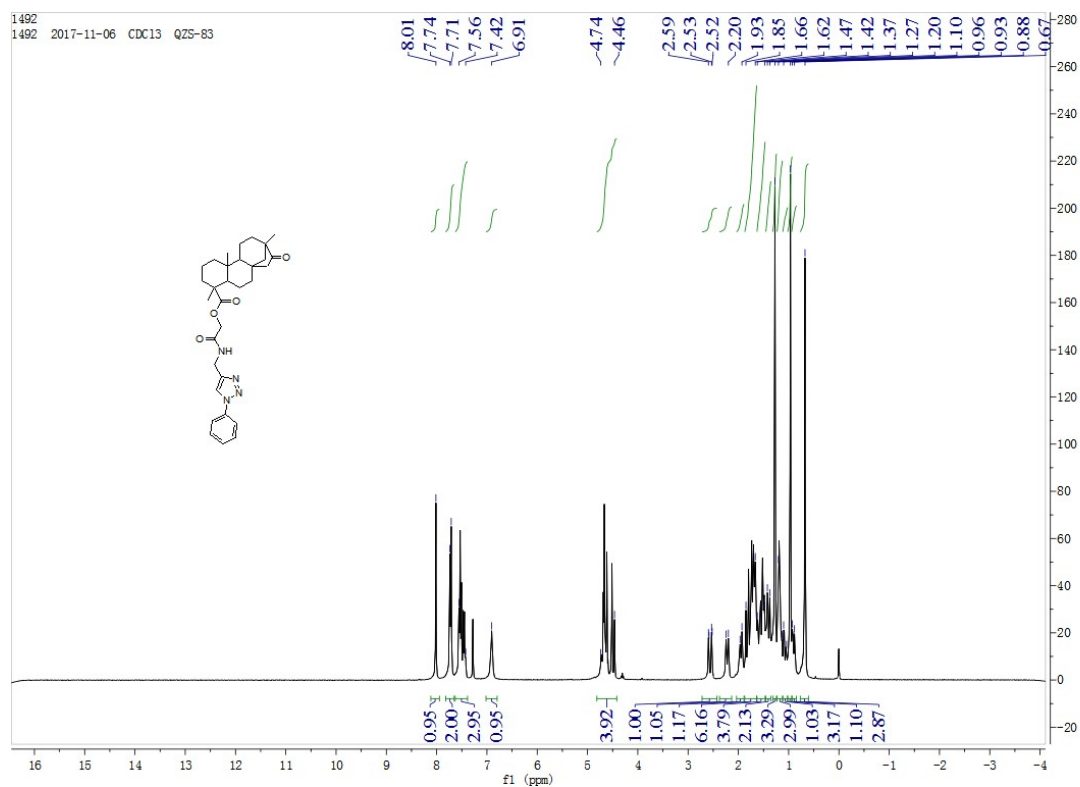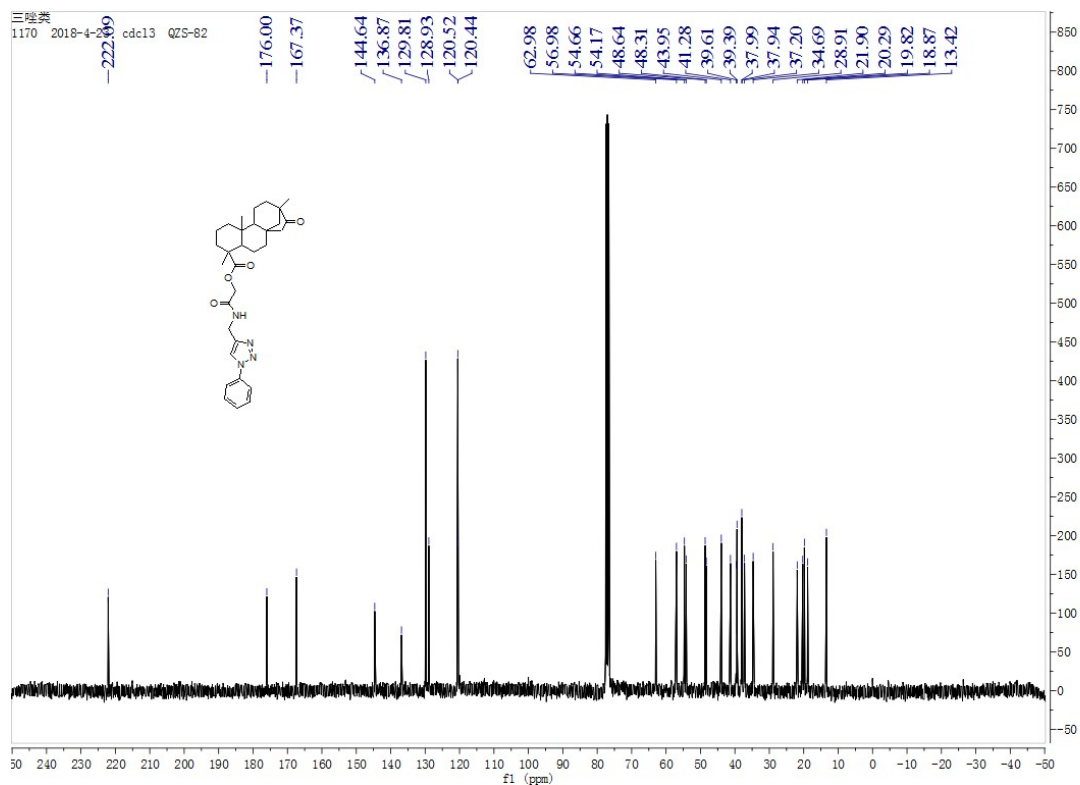

<sup>1</sup>H NMR and <sup>13</sup>C NMR spectra of compound 5a

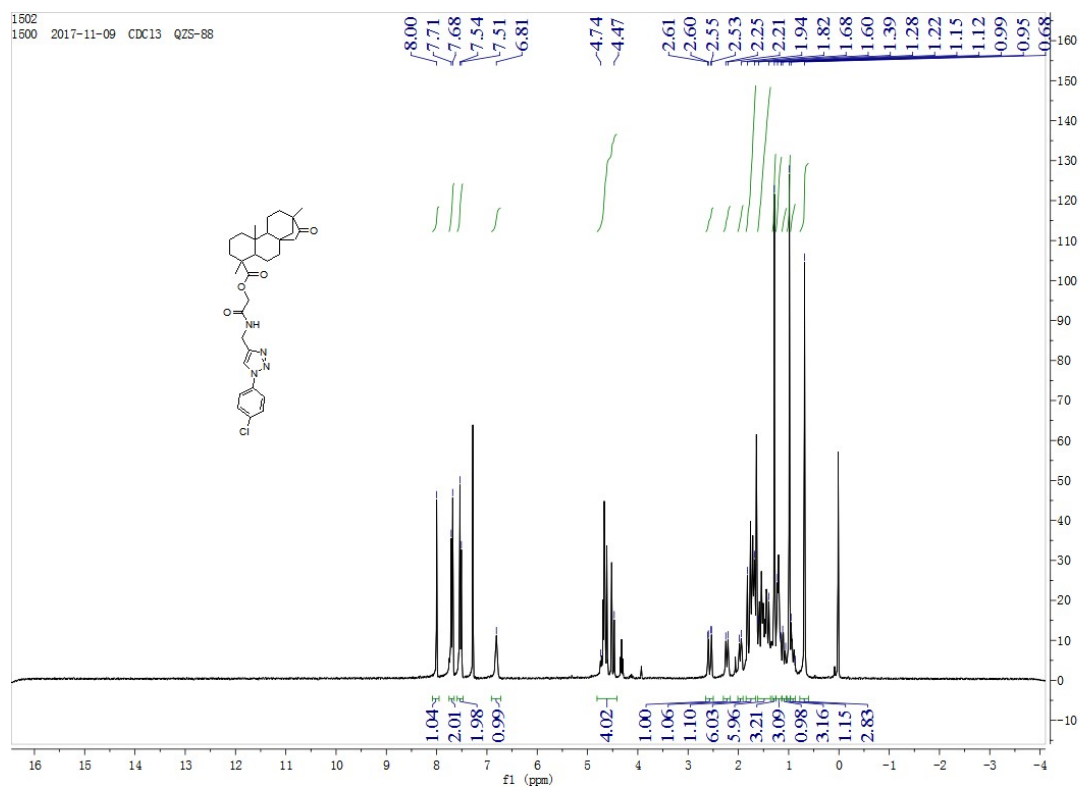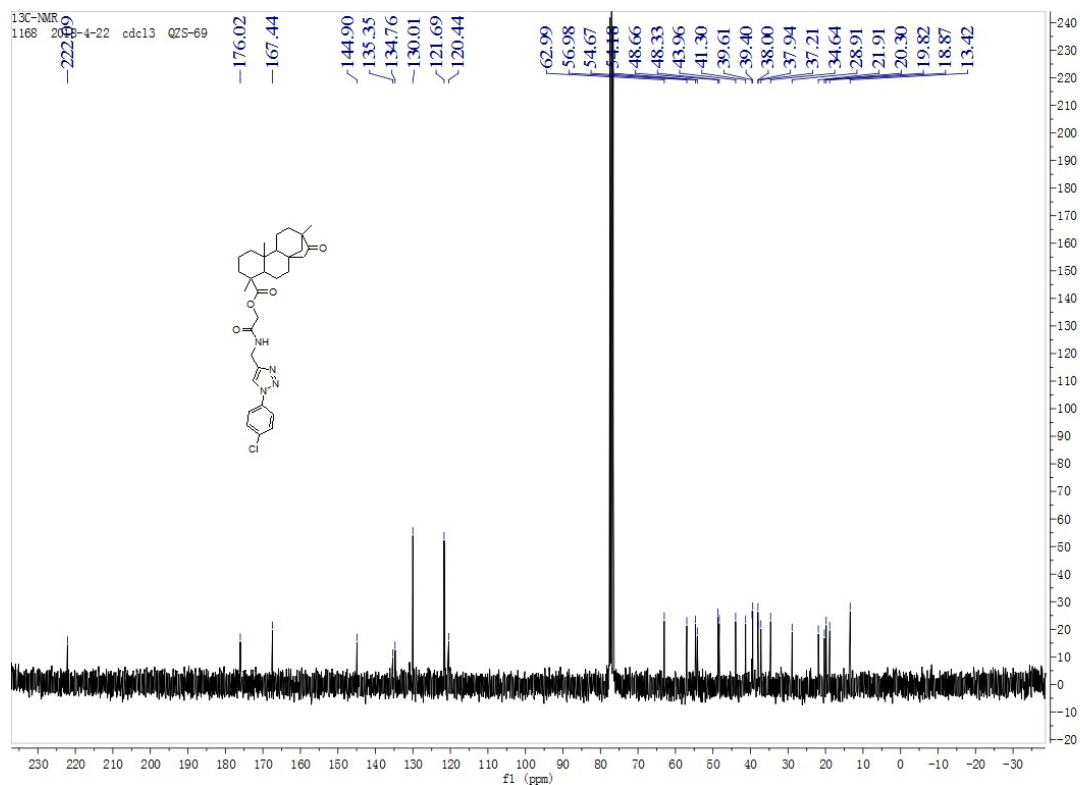

<sup>1</sup>H NMR and <sup>13</sup>C NMR spectra of compound **5b**

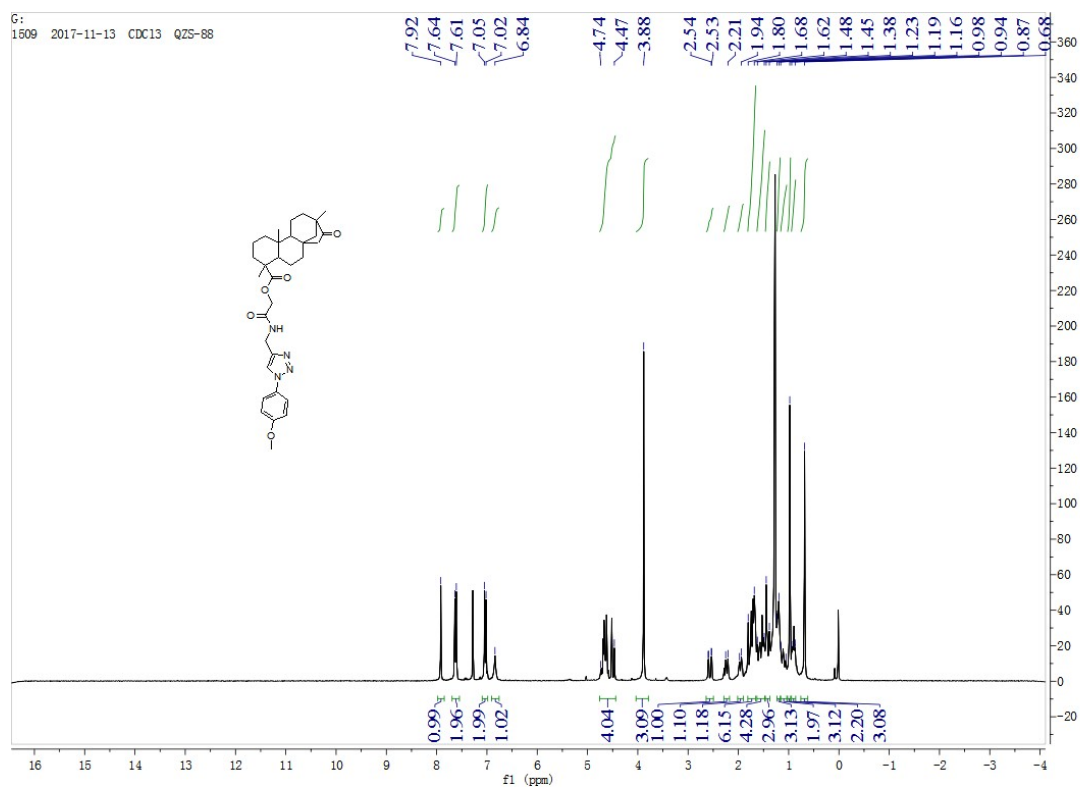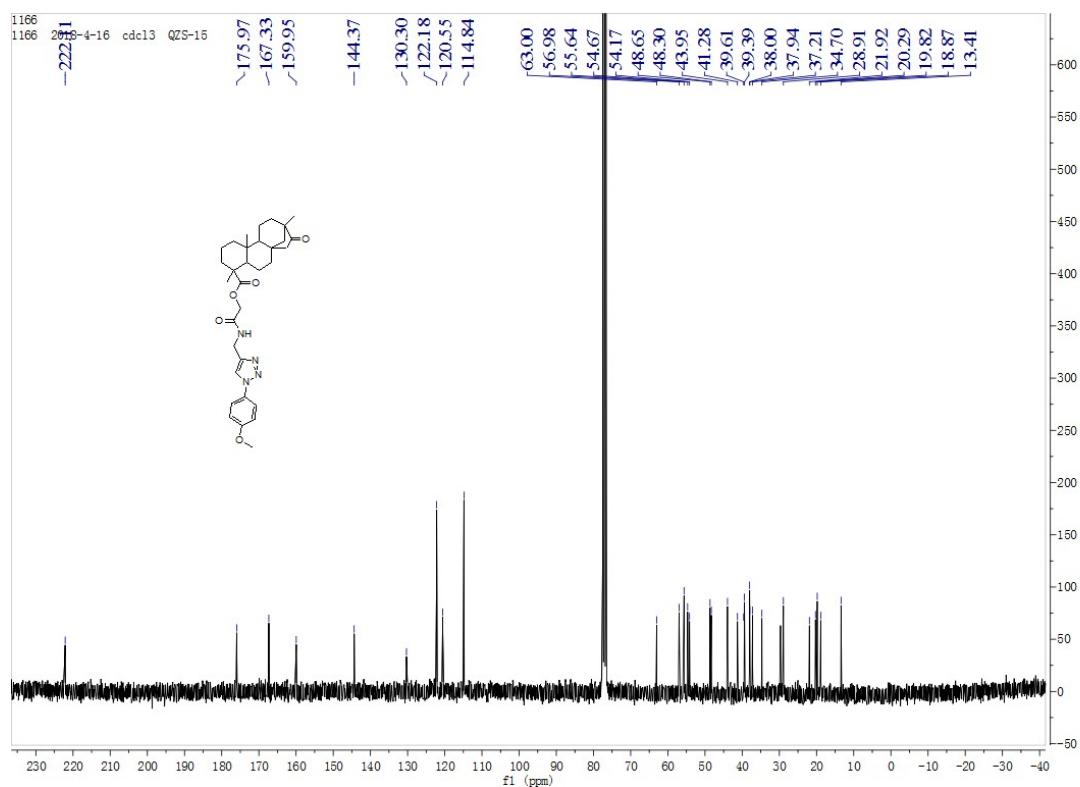

<sup>1</sup>H NMR and <sup>13</sup>C NMR spectra of compound 5c

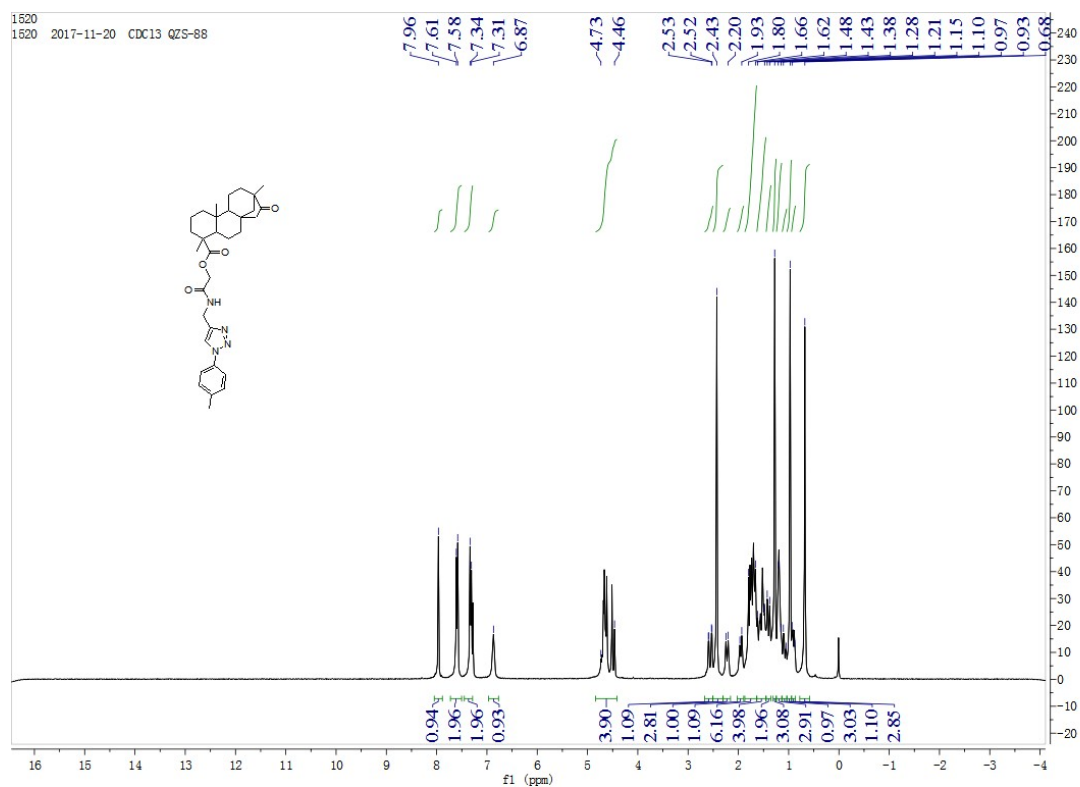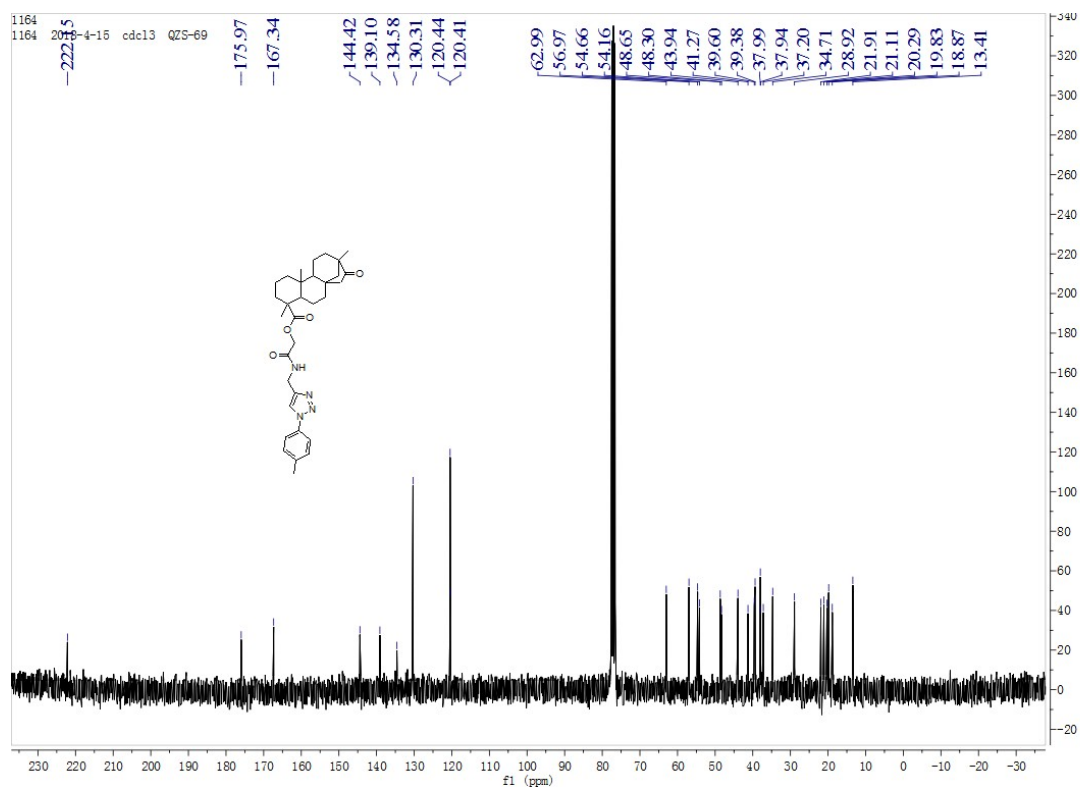

<sup>1</sup>H NMR and <sup>13</sup>C NMR spectra of compound 5d

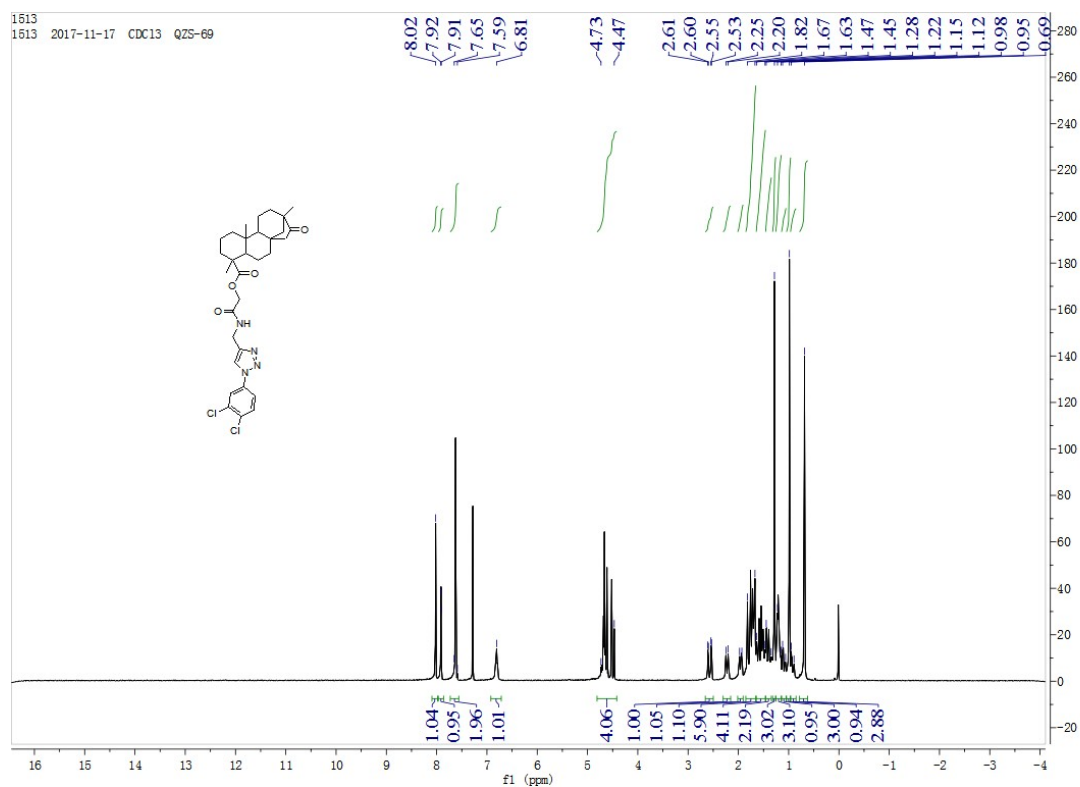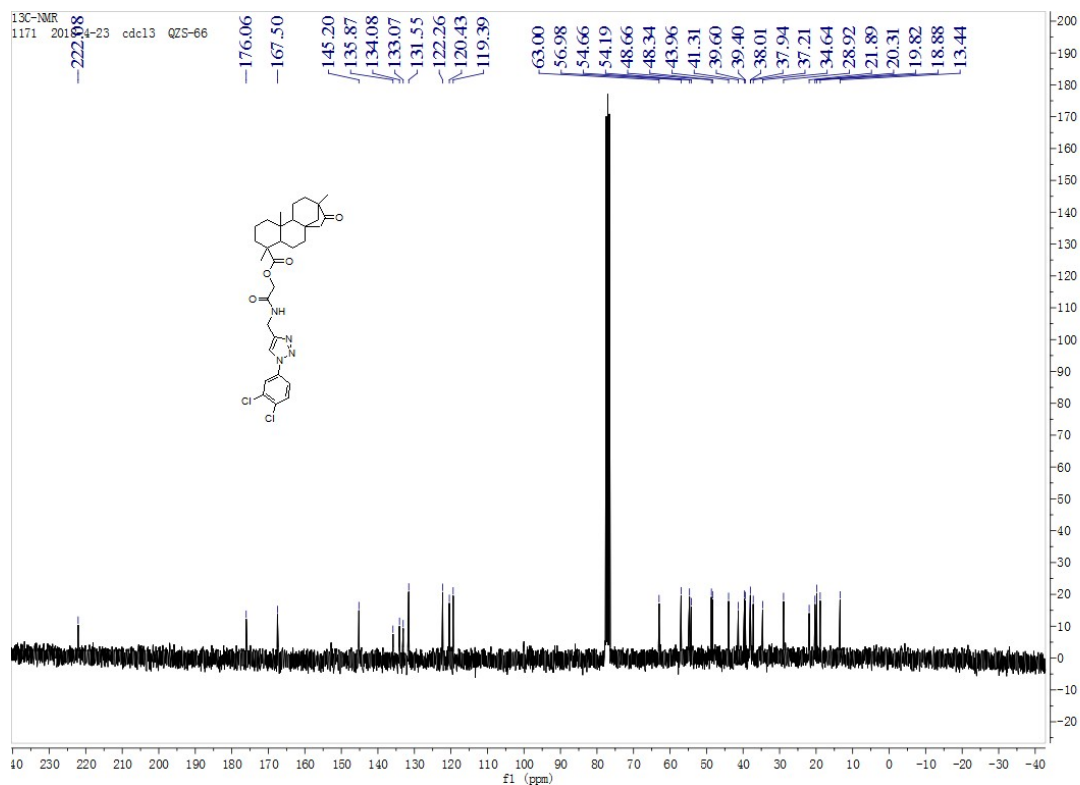

<sup>1</sup>H NMR and <sup>13</sup>C NMR spectra of compound **5e**

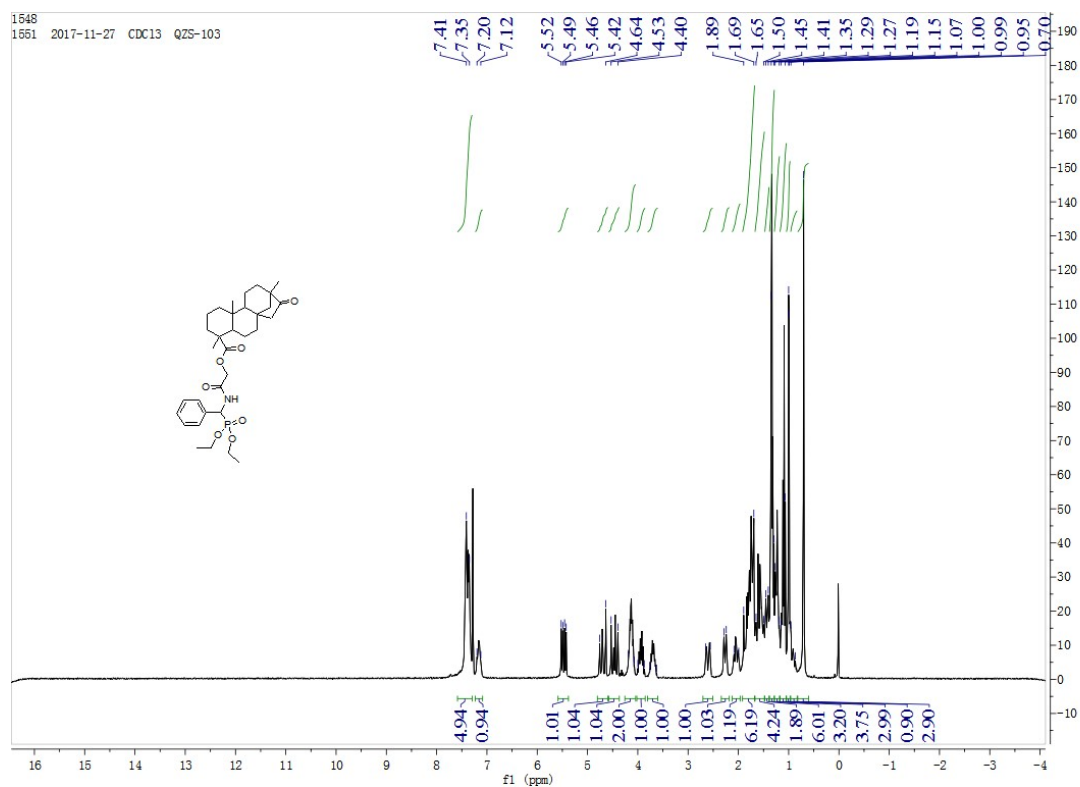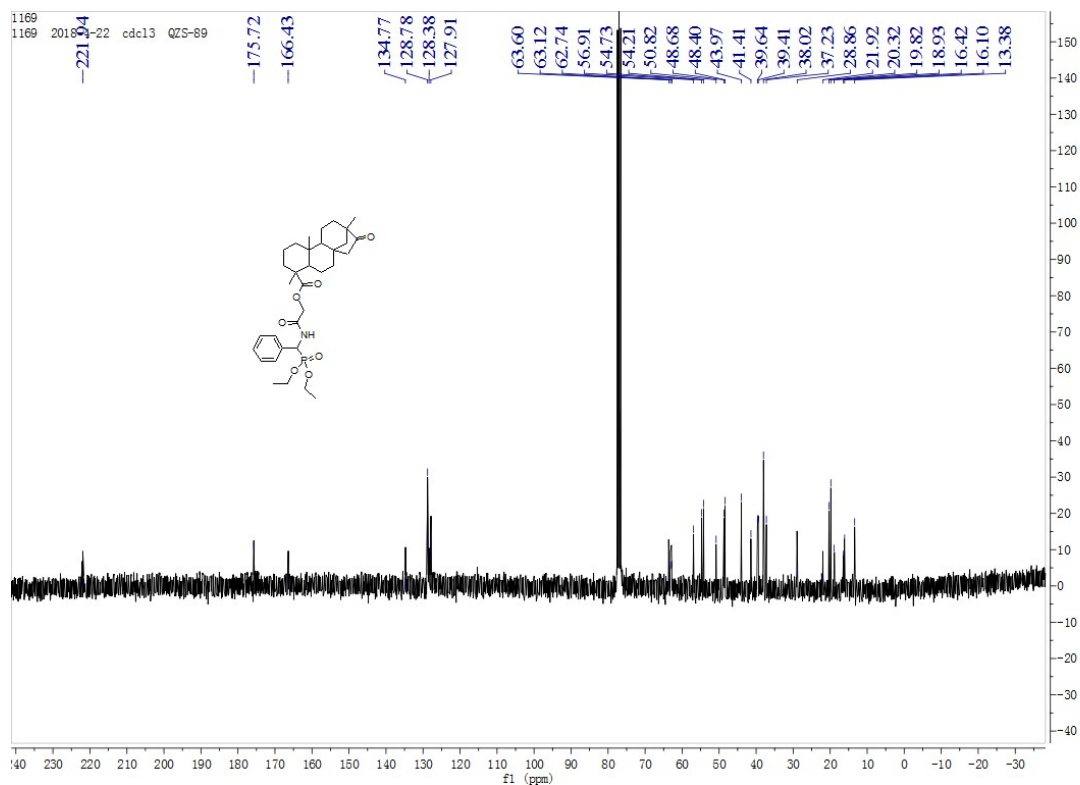

<sup>1</sup>H NMR and <sup>13</sup>C NMR spectra of compound **6a**

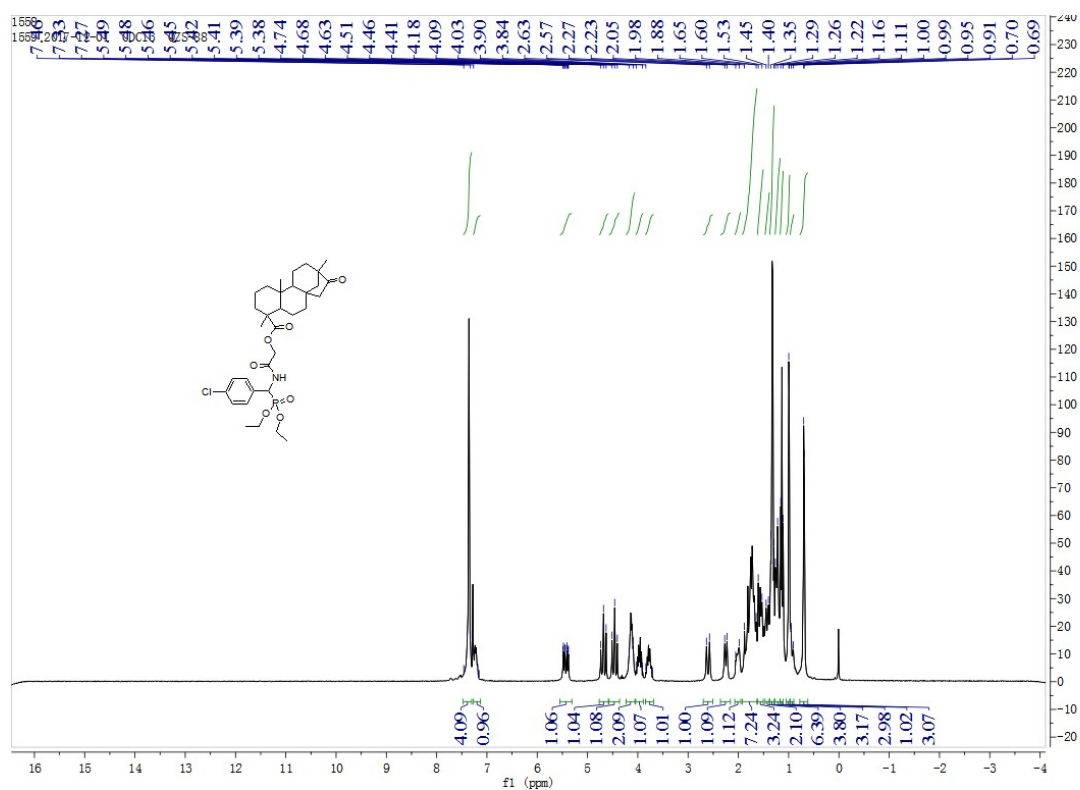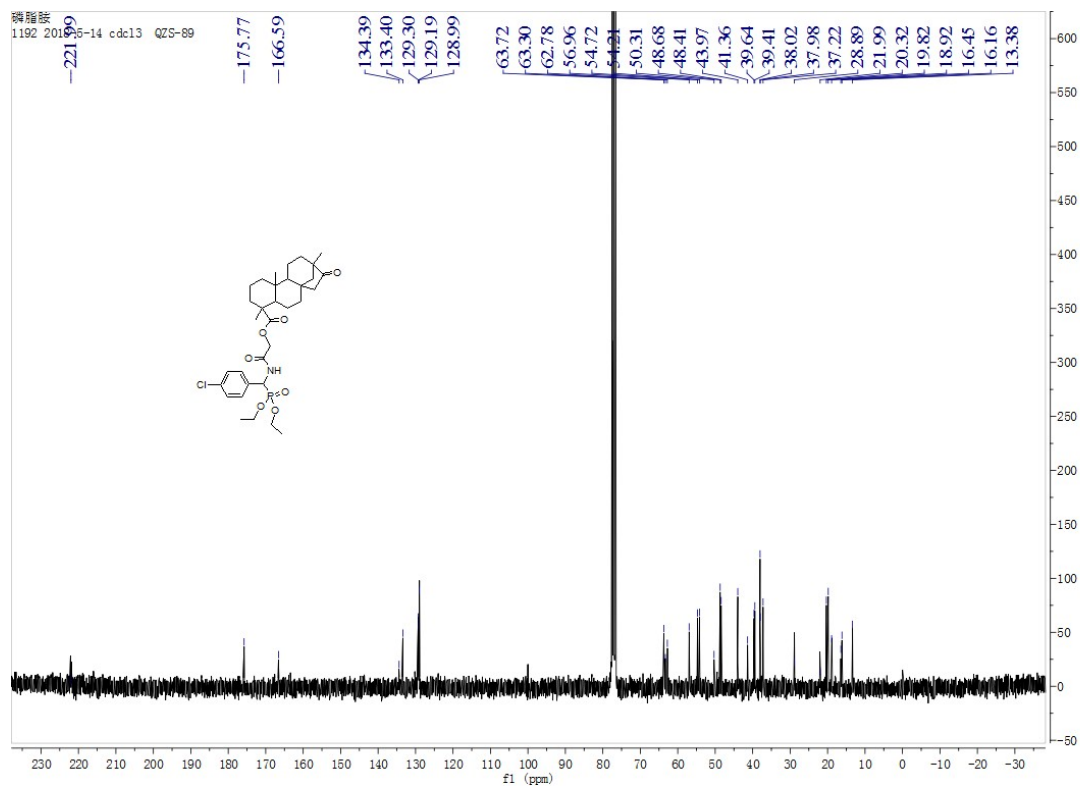

**<sup>1</sup>H NMR and <sup>13</sup>C NMR spectra of compound 6b**

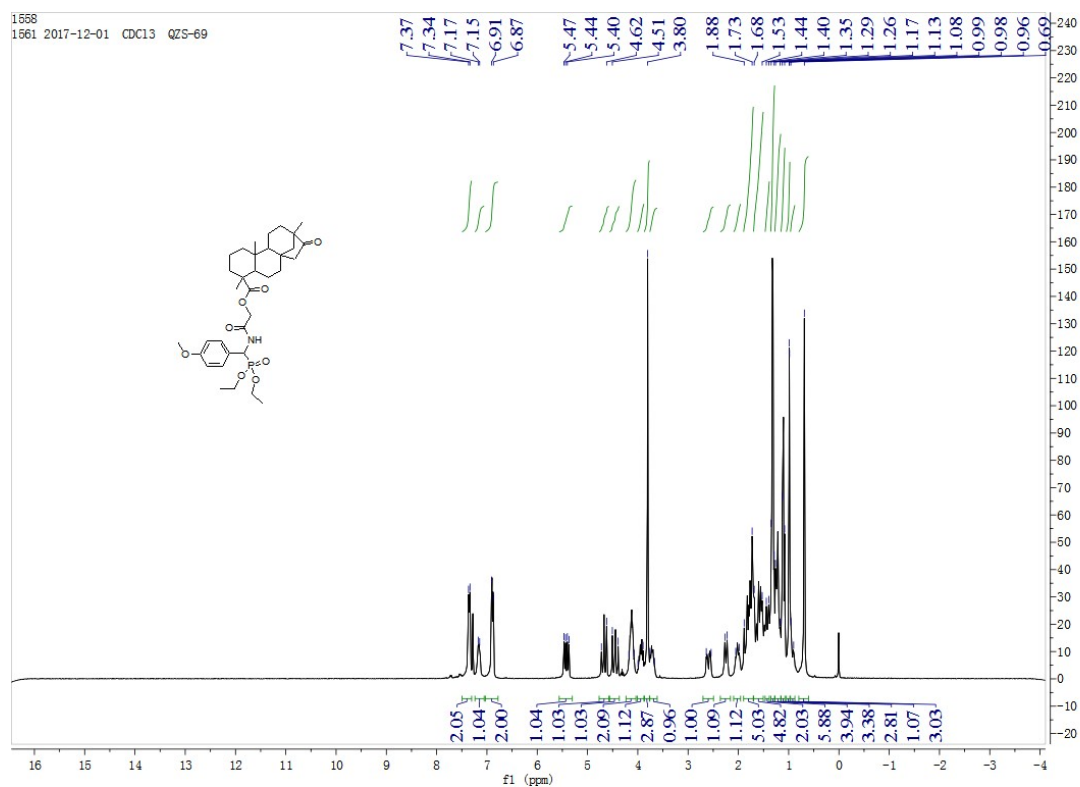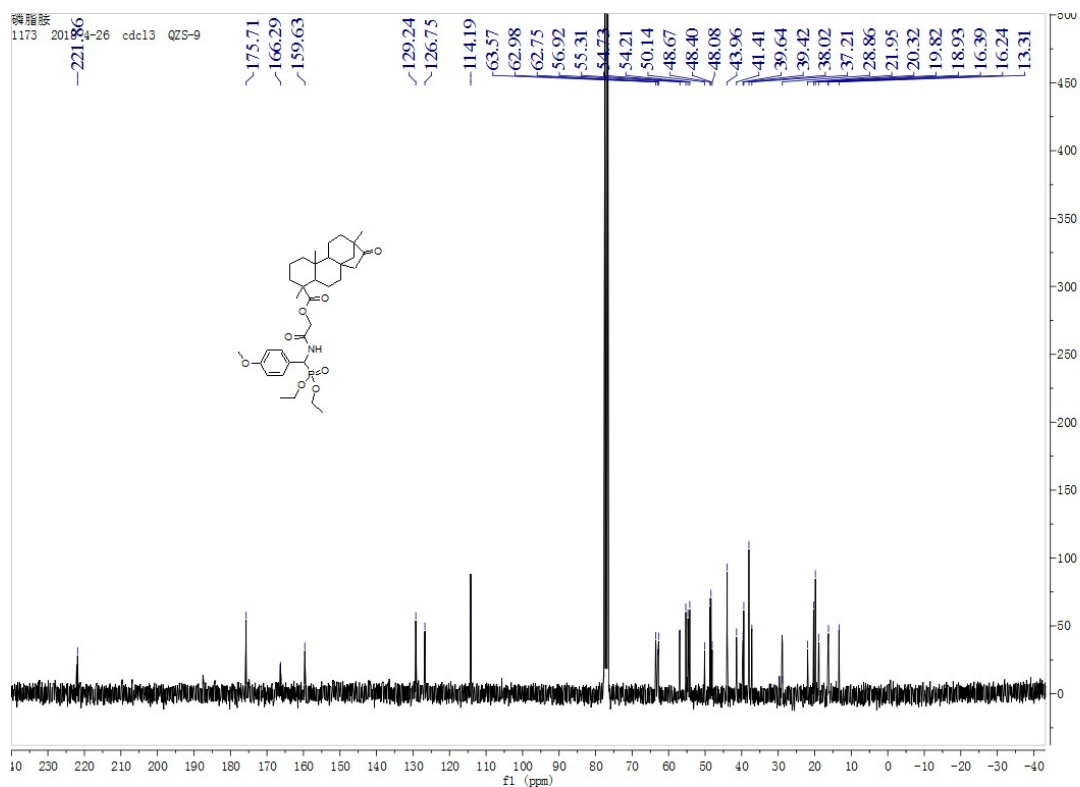

$^1\text{H}$  NMR and  $^{13}\text{C}$  NMR spectra of compound 6c

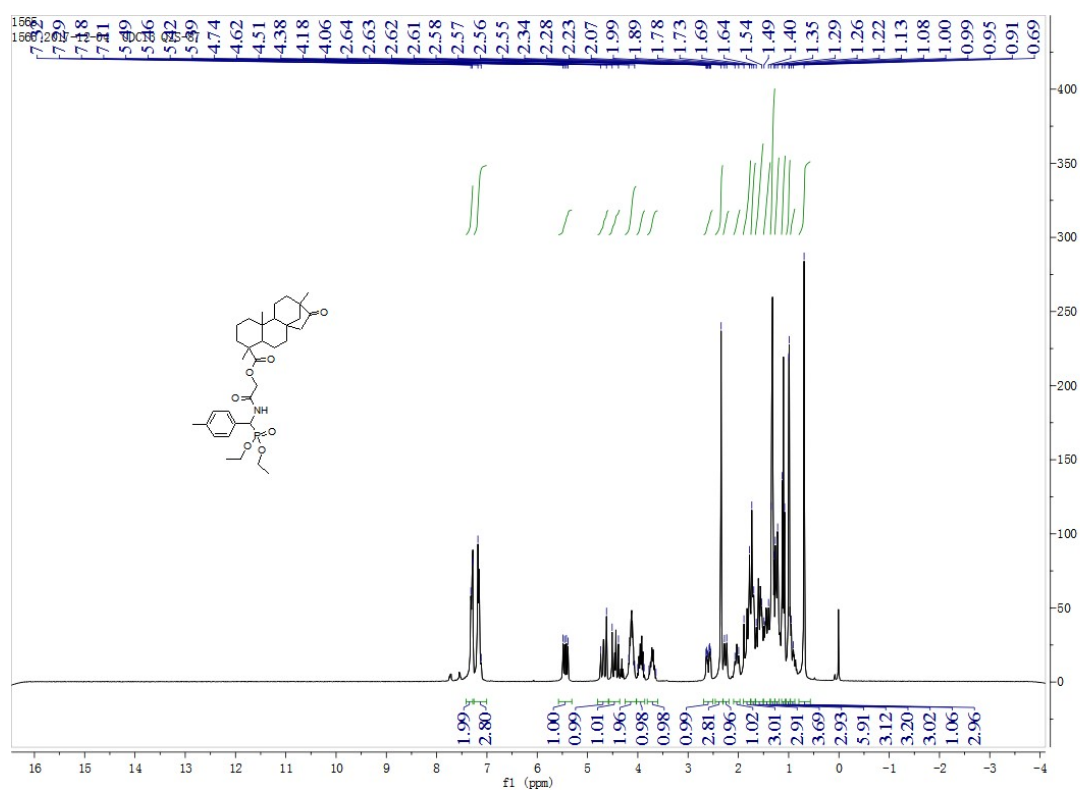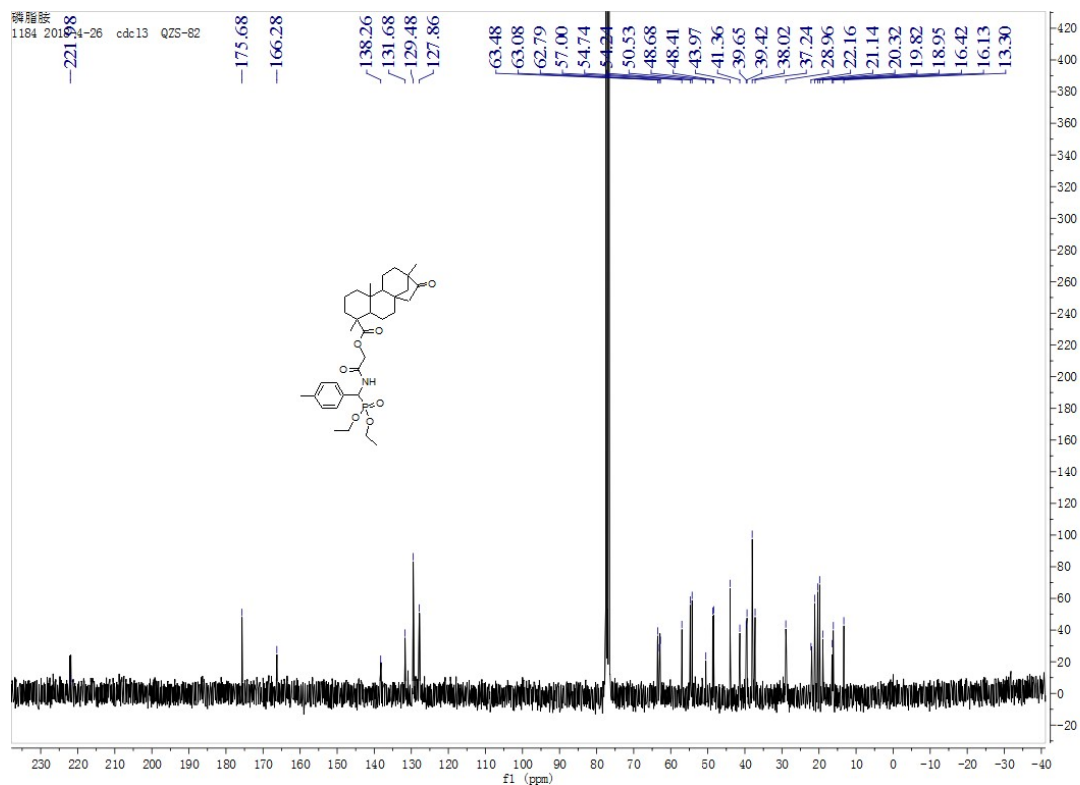

<sup>1</sup>H NMR and <sup>13</sup>C NMR spectra of compound 6d

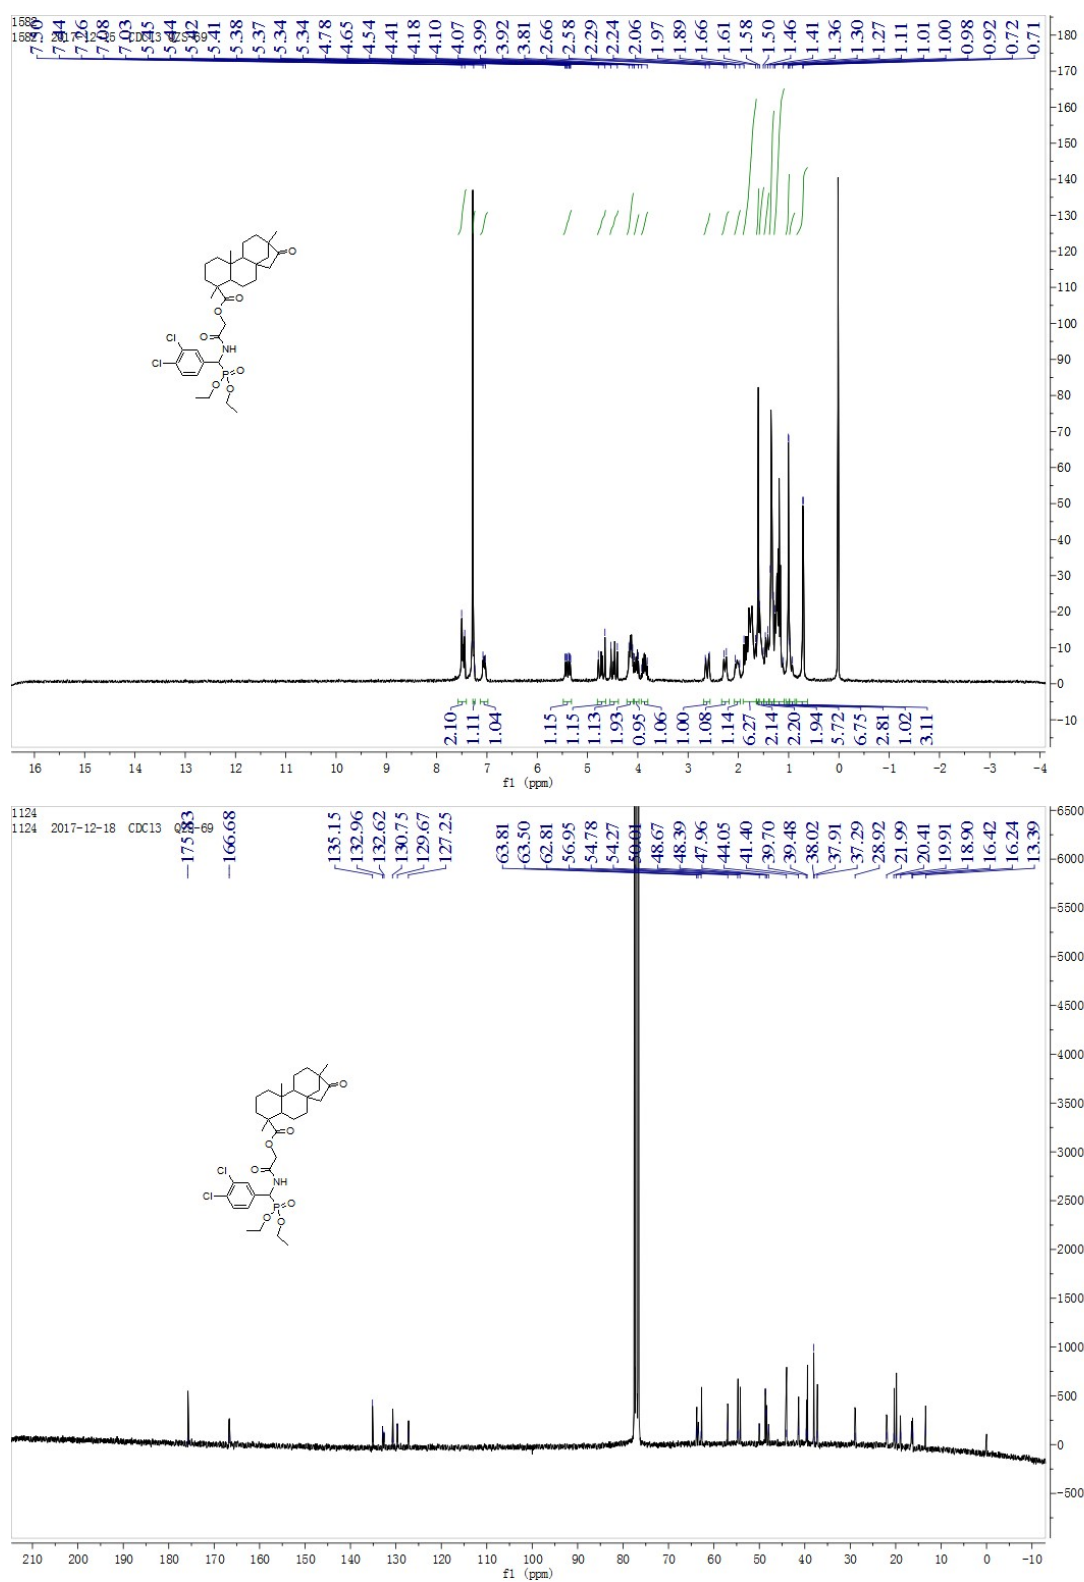

<sup>1</sup>H NMR and <sup>13</sup>C NMR spectra of compound **6e**

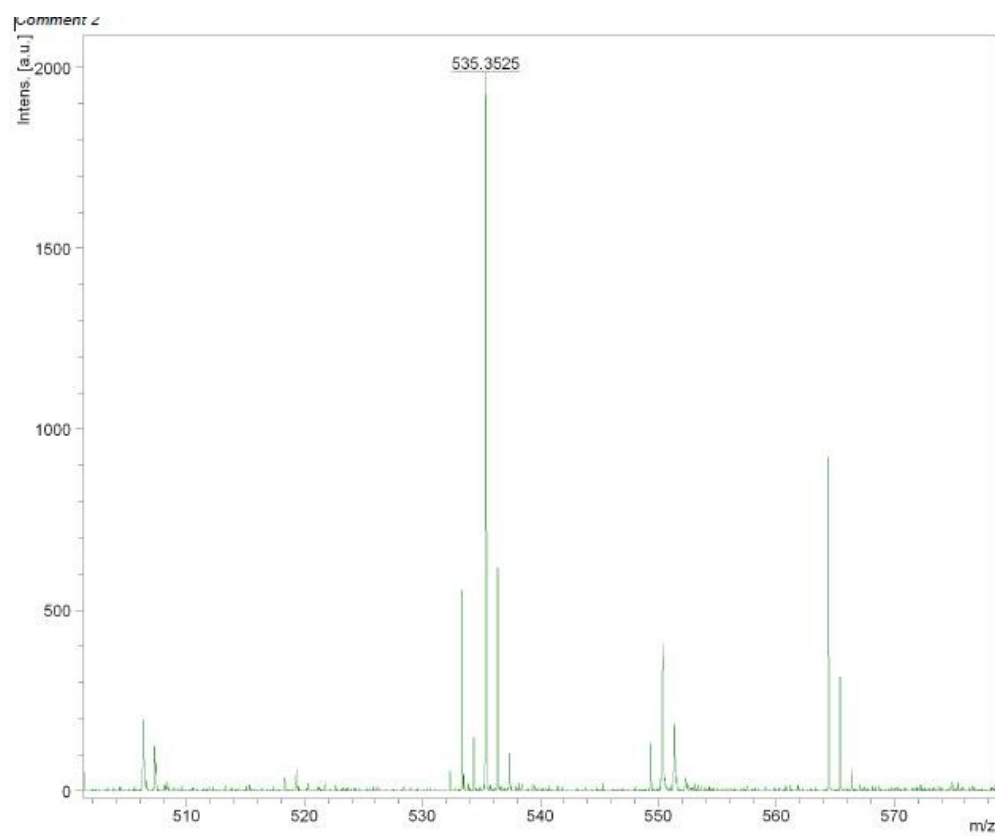

**Acquisition Parameter**

|                            |                                                     |
|----------------------------|-----------------------------------------------------|
| Date of acquisition        | 2018-06-23T13:00:40.158+08:00                       |
| Acquisition method name    | D:\Methods\flexControlMethods\gc-RP_100-1500_Da.par |
| Acquisition operation mode | Reflector                                           |

HRMS spectra of compound **2d**

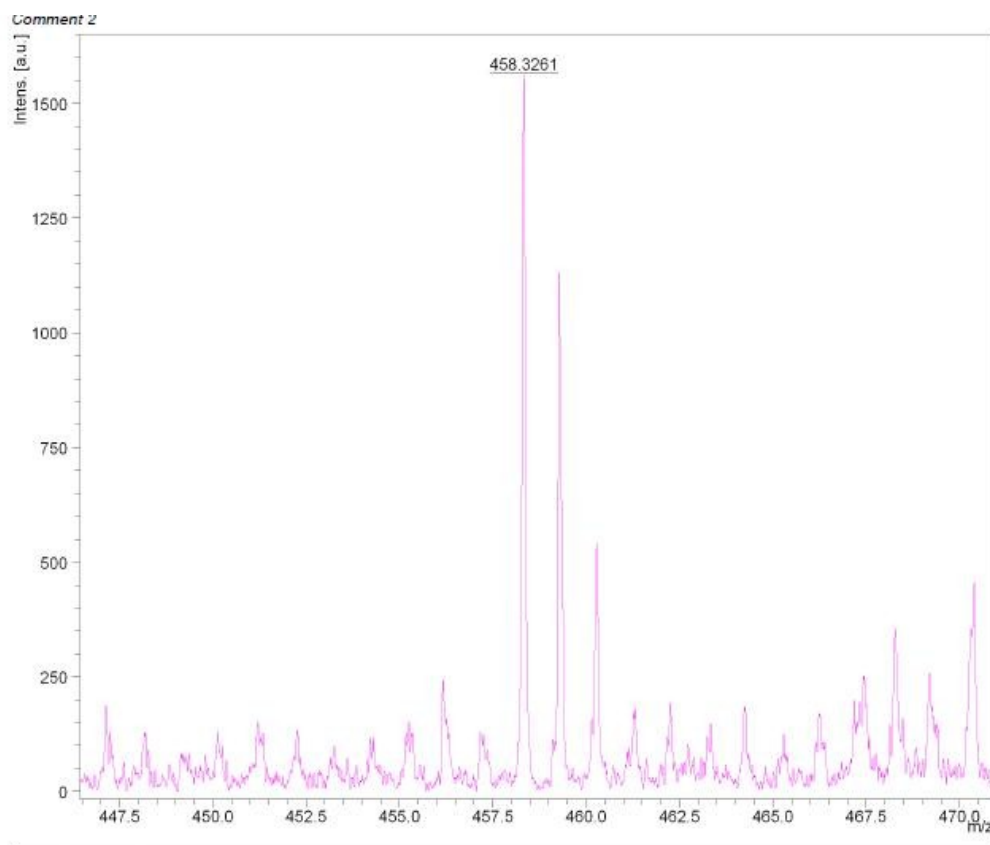

**Acquisition Parameter**

|                            |                                                     |
|----------------------------|-----------------------------------------------------|
| Date of acquisition        | 2018-06-23T13:01:50.814+08:00                       |
| Acquisition method name    | D:\Methods\flexControlMethods\gc-RP_100-1500_Da.par |
| Acquisition operation mode | Reflector                                           |

HRMS spectra of compound **2e**

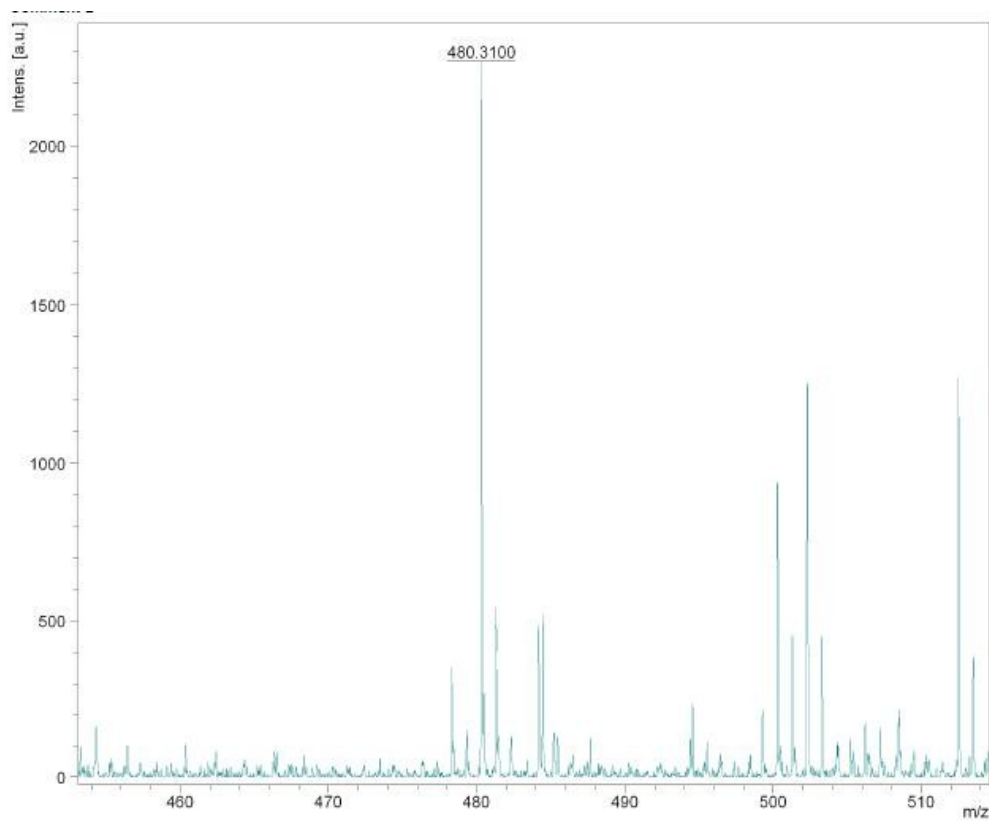

**Acquisition Parameter**

|                            |                                                     |
|----------------------------|-----------------------------------------------------|
| Date of acquisition        | 2018-06-23T12:15:14.908+08:00                       |
| Acquisition method name    | D:\Methods\flexControlMethods\gc-RP_100-1500_Da.par |
| Acquisition operation mode | Reflector                                           |

HRMS spectra of compound **3b**

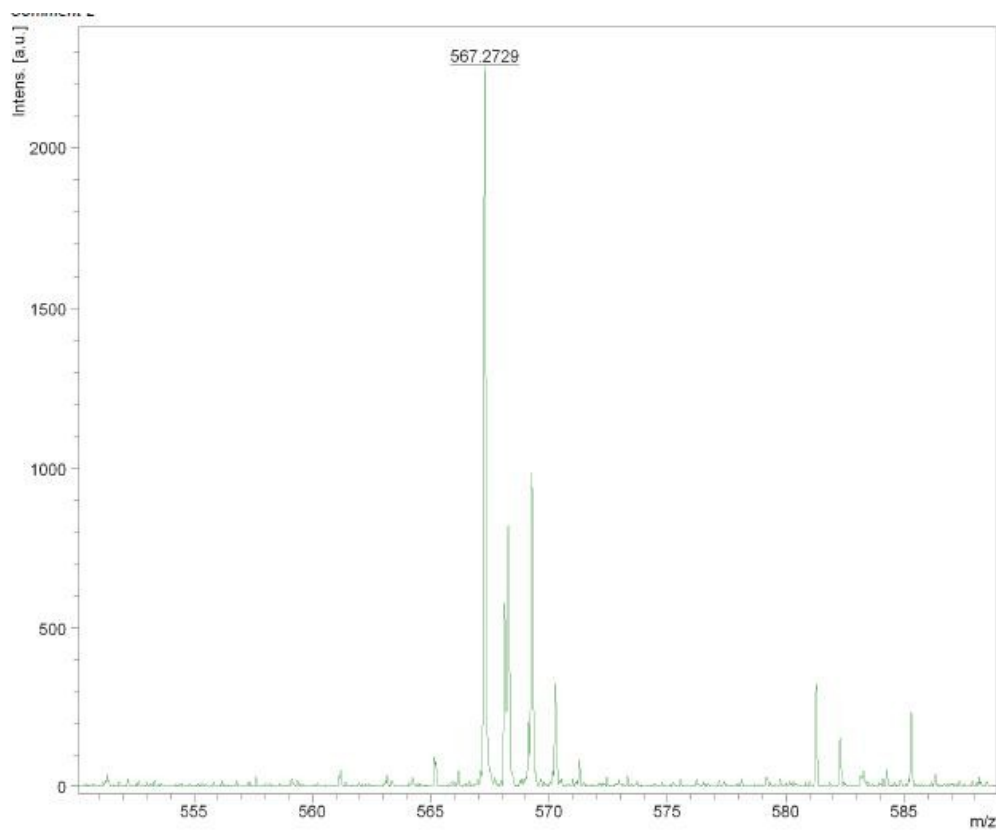

**Acquisition Parameter**

|                            |                                                     |
|----------------------------|-----------------------------------------------------|
| Date of acquisition        | 2018-06-20T20:10:16.411+08:00                       |
| Acquisition method name    | D:\Methods\flexControlMethods\gc-RP_100-1500_Da.par |
| Acquisition operation mode | Reflector                                           |

HRMS spectra of compound **5b**

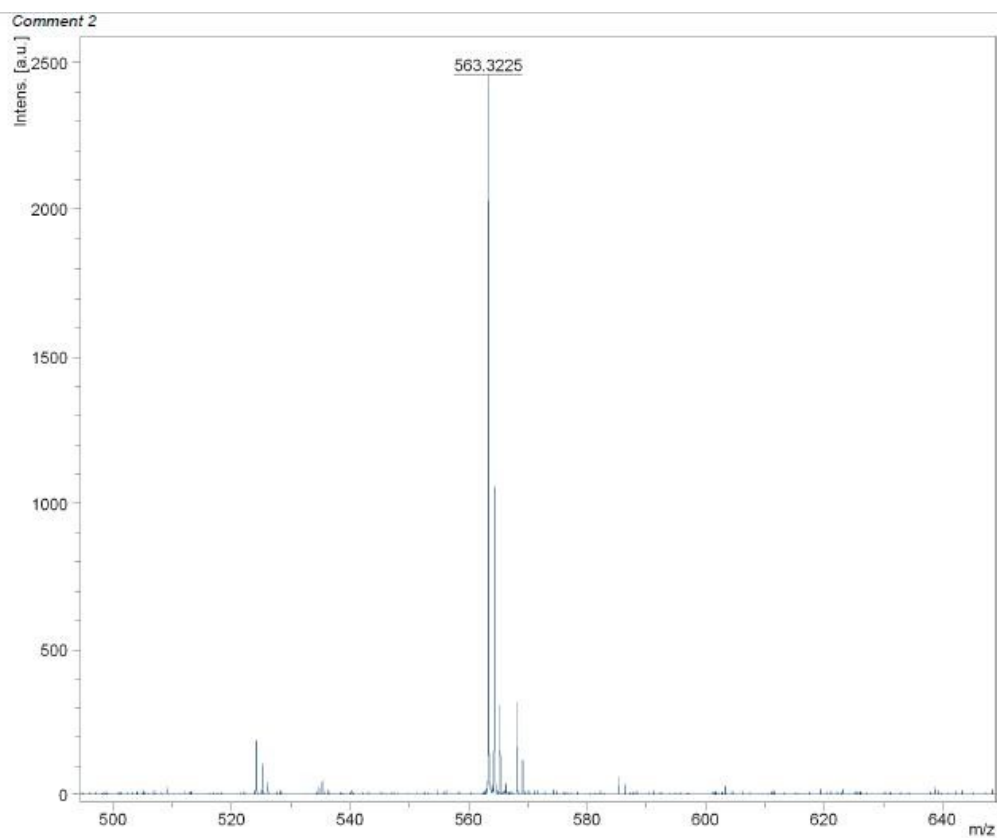

**Acquisition Parameter**

|                            |                                                     |
|----------------------------|-----------------------------------------------------|
| Date of acquisition        | 2018-06-20T20:10:40.427+08:00                       |
| Acquisition method name    | D:\Methods\flexControlMethods\gc-RP_100-1500_Da.par |
| Acquisition operation mode | Da-Sector                                           |

HRMS spectra of compound **5c**

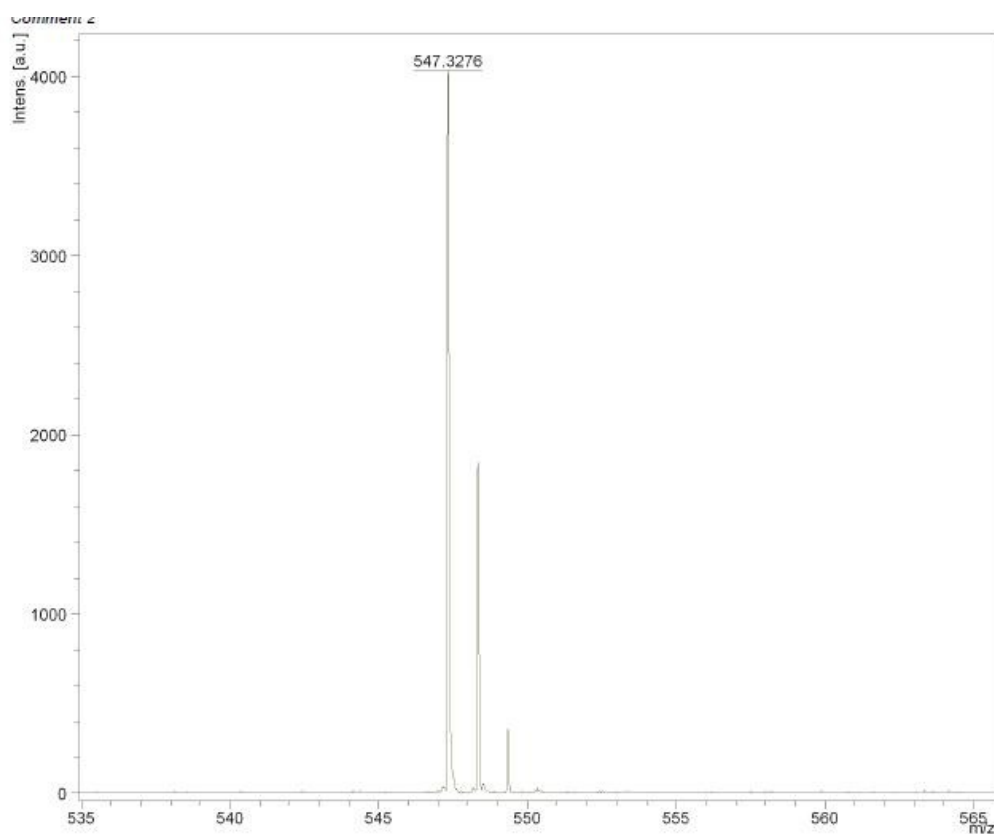

**Acquisition Parameter**

|                            |                                                     |
|----------------------------|-----------------------------------------------------|
| Date of acquisition        | 2018-06-20T20:10:50.974+08:00                       |
| Acquisition method name    | D:\Methods\flexControlMethods\gc-RP_100-1500_Da.par |
| Acquisition operation mode | Reflector                                           |

HRMS spectra of compound **5d**

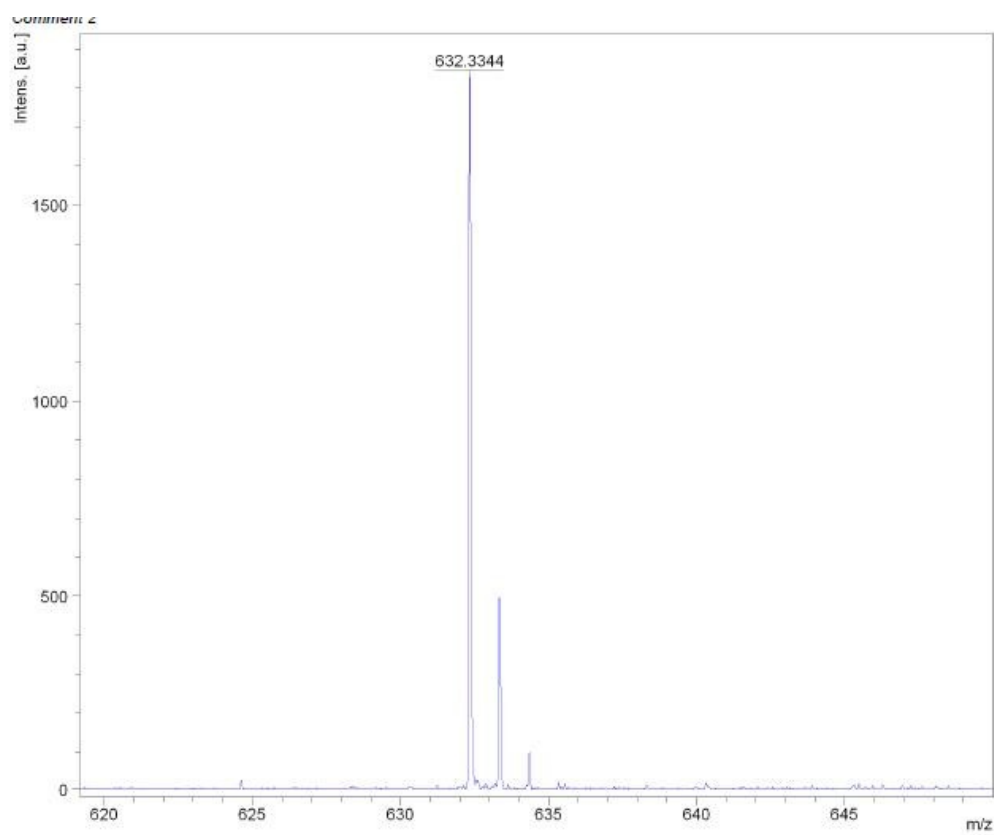

**Acquisition Parameter**

|                            |                                                    |
|----------------------------|----------------------------------------------------|
| Date of acquisition        | 2018-06-23T13:03:24.424+08:00                      |
| Acquisition method name    | D:\Method\flexControlMethods\gc-RP_100-1500_Da.par |
| Acquisition operation mode | Reflector                                          |

HRMS spectra of compound **6c**

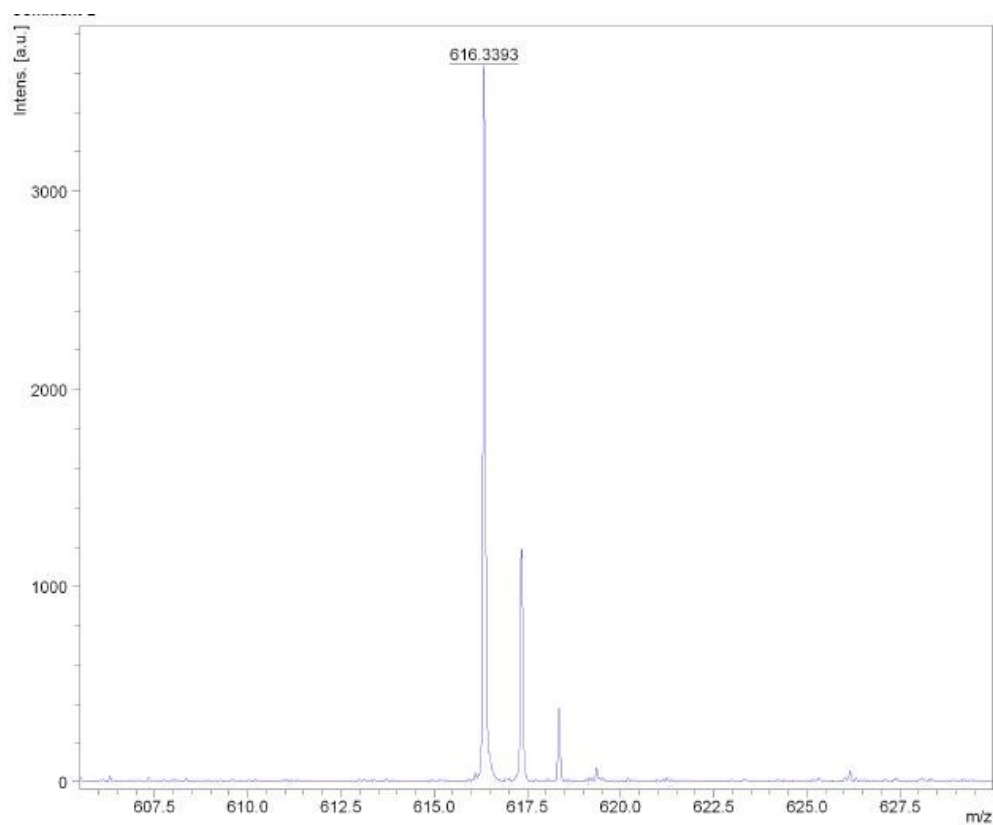

**Acquisition Parameter**

|                            |                                                     |
|----------------------------|-----------------------------------------------------|
| Date of acquisition        | 2018-06-20T20:12:12.911+08:00                       |
| Acquisition method name    | D:\Methods\flexControlMethods\gc-RP_100-1500_Da.par |
| Acquisition operation mode | Reflector                                           |

HRMS spectra of compound **6d**

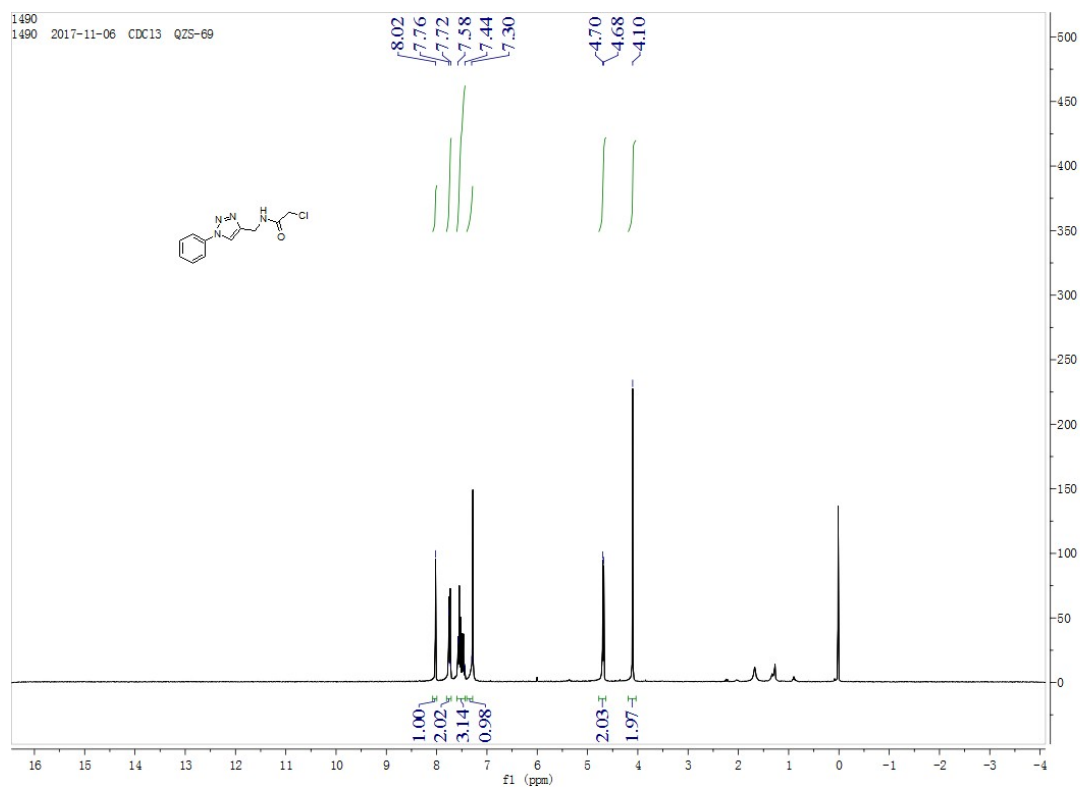

<sup>1</sup>H-NMR spectra of intermediate **Va**

<sup>1</sup>H-NMR (CDCl<sub>3</sub>, 300MHz, ppm): δ 8.02 (s, 1H, triazole-H), 7.76-7.72 (m, 2H, Ar-H), 7.58-7.44 (m, 3H, Ar-H), 7.30 (brs, 1H, -NH-CO-), 4.69 (d, *J*= 6 Hz, 2H, -CH<sub>2</sub>-NH-), 4.10 (s, 2H, -CH<sub>2</sub>-Cl).
